1 **Title Page**

2 **Full title:** Lifestyles and their relative contribution to biological aging across multiple  
3 organ systems: change analysis from the China Multi-Ethnic Cohort Study

4 Yuan Zhang<sup>1,#</sup>, Dan Tang<sup>2,1,#</sup>, Ning Zhang<sup>1</sup>, Yi Xiang<sup>1</sup>, Yifan Hu<sup>1</sup>, Wen Qian<sup>3</sup>, Yangji  
5 Baima<sup>4</sup>, Xianbin Ding<sup>5</sup>, Ziyun Wang<sup>6</sup>, Jianzhong Yin<sup>7,\*</sup>, Xiong Xiao<sup>1,\*</sup>, Xing Zhao<sup>1</sup>

6 **Affiliations:**

7 <sup>1</sup> West China School of Public Health and West China Fourth Hospital, Sichuan  
8 University, Chengdu, China;

9 <sup>2</sup> Xiamen Center for Disease Control and Prevention, Xiamen, China

10 <sup>3</sup> Chengdu Center for Disease Control and Prevention, Chengdu, China;

11 <sup>4</sup> School of Medicine, Tibet University, Lhasa, China;

12 <sup>5</sup> Chongqing Municipal Centre for Disease Control and Prevention, Chongqing,  
13 China;

14 <sup>6</sup> School of Public Health, the Key Laboratory of Environmental Pollution Monitoring  
15 and Disease Control, Ministry of Education, Guizhou Medical University, Guiyang,  
16 China;

17 <sup>7</sup> School of Public Health, Kunming Medical University, Kunming, China;

18 <sup>#</sup> Joint first authors, these authors contributed equally to this work;

19 <sup>\*</sup> Co-corresponding author: Jianzhong Yin, E-mail: [yinjianzhong2005@sina.com](mailto:yinjianzhong2005@sina.com),  
20 Address: No. 1168, Chunrong West Road, Yuhua Street, Chenggong District,  
21 Kunming, Yunnan, 650500, China; Xiong Xiao, E-mail: [xiaoxiong.scu@scu.edu.cn](mailto:xiaoxiong.scu@scu.edu.cn),

22 Address: No.16, People's South Road, Chengdu, Sichuan, 610041, China.

NOTE: This preprint reports new research that has not been certified by peer review and should not be used to guide clinical practice.

## 23 **Funding**

24 This work was primarily supported by the National Natural Science Foundation  
25 of China (Grant No. 82273740). The CMEC study was funded by the National Key  
26 Research and Development Program of China (Grant No. 2017YFC0907305,  
27 2017YFC0907300). The sponsors had no role in the design, analysis, interpretation,  
28 or writing of this article.

## 29 **Ethics approval and consent to participate**

30 This study was approved by the Sichuan University Medical Ethical Review  
31 Board [ID: K2016038, K2020022]. All procedures in the study were consistent with  
32 the 1964 Declaration of Helsinki and its subsequent amendments. All subjects  
33 agreeing to take part in the study signed informed written consent.

## 34 **Abbreviations used**

35 ALB: Albumin; ALP: Alkaline phosphatase; aMED: Alternative Mediterranean diet;  
36 AST: Aspartate aminotransferase, BA: Biological age; BMI: Body mass index; CVD:  
37 Cardiovascular disease; CMEC: China Multi-Ethnic Cohort Study; CA:  
38 Chronological age; Cr: Creatinine; FEM: Fixed effects model; GGT:  $\gamma$ -Glutamyl  
39 transpeptidase; HBA1C: Glycosylated hemoglobin; HLI: Healthy lifestyle index;  
40 HDL-CH: High-density lipoprotein cholesterol; IQR: Interquartile range; KDM-BA:  
41 Klemera-Doubal method of biological age; LDL-CH: Low-density lipoprotein  
42 cholesterol; MCV: Mean corpuscular volume; PEF: Peak expiratory flow; PLT:  
43 Platelet count; QGC: Quantile G-computation; SBP: Systolic blood pressure; TG:  
44 Triglyceride; WHR: Waist-to-hip ratio.



46 **Abstract**

47 **Background**

48 Biological aging exhibits heterogeneity across multi organ systems. However, it  
49 remains unclear how is lifestyle associated with overall and organ-specific aging and  
50 which factors contribute most in Southwest China.

51 **Objective**

52 To examine the associations of healthy lifestyle with comprehensive and organ-  
53 specific biological ages and which factors contribute most.

54 **Methods**

55 This study involved 8,396 participants who completed two surveys from the China  
56 Multi-Ethnic Cohort (CMEC) Study. The healthy lifestyle index (HLI) was developed  
57 using five lifestyle factors: smoking, alcohol, diet, exercise, and sleep. The  
58 comprehensive and organ-specific biological ages (BAs) were calculated using the  
59 Klemmera-Doubal method based on longitudinal clinical laboratory measurements, and  
60 validation were conducted to select BA reflecting related diseases. Fixed effects  
61 model was used to examine associations between HLI or its components and the  
62 acceleration of validated BAs. We further evaluated the relative contribution of  
63 lifestyle components to comprehension and organ systems BAs using quantile G-  
64 computation.

65 **Results**

66 About two-thirds of participants changed HLI scores between surveys. After  
67 validation, three organ-specific BAs (the cardiopulmonary, metabolic, and liver BAs)

68 were identified as reflective of specific diseases and included in further analyses with  
69 the comprehensive BA. The health alterations in healthy lifestyle index showed a  
70 protective association with the acceleration of all biological ages, with a mean shift of  
71 -0.19 (95%CI: -0.34, -0.03) in the comprehensive biological age acceleration. Diet  
72 and smoking were the major contributors to overall negative associations of five  
73 lifestyle factors with the comprehensive BA and metabolic BA accounting for 24%  
74 and 55% respectively.

## 75 **Conclusions**

76 Healthy lifestyle changes were inversely related to comprehensive and organ-specific  
77 biological aging in Southwest China, with diet and smoking contributing most to  
78 comprehensive and metabolic BA separately. Our findings highlight the potential of  
79 lifestyle interventions to decelerate aging and identify intervention targets to limit  
80 organ-specific aging in less-developed regions.

81 **Keywords:** healthy lifestyle; biological aging; organ-specific aging; change analysis;  
82 Kleméra-Doubal method of biological age.  
83

## 84 **Introduction**

85 Aging is a global issue, with about 10 percent of the world population aged 65 years  
86 and over in 2022, and the proportion expected to be near 16 percent by 2050(1). In  
87 China, the proportion has reached 14.2% at the end of 2021(2). Aging leads to  
88 reduced life expectancy and chronic diseases through dynamic and heterogeneous  
89 changes in biological systems(3). While chronological age (CA) is widely used as a  
90 marker of aging, biological age (BA) has been constructed as a more accurate  
91 indicator for biological aging(4). Aging exhibits variations across and with  
92 individuals; people with the same CA can age at different rates, and distinct organ  
93 systems within an individual can also age differently(5). Comprehensive aging  
94 indicators like epigenetic clocks and PhenoAge, capturing different aging aspects,  
95 have been developed(6, 7). Recent studies have focused on organ-specific aging  
96 markers to understand their aging rate variations(8, 9). The process of biological  
97 aging, influenced by genetics, environment, and health behaviors, is modifiable, yet  
98 research has predominantly concentrated on comprehensive biological age (10-13).  
99 Nevertheless, current research on determinants of multi-organ biological aging  
100 remains limited. Further investigation is crucial to deepen understanding of  
101 comprehensive and organ-specific biological aging and to develop targeted  
102 interventions for age-related diseases of each organ system.

103 Lifestyle factors such as smoking, drinking, diet, physical activity, and sleep are  
104 recognized as contributors to many age-related diseases(14-16), and researchers have  
105 begun to explore how lifestyle factors influence the process of biological aging.

106 Studies on lifestyle and BA can be summarized into two categories, one focusing on  
107 the association of a single lifestyle factor with biological aging(17-20) because  
108 lifestyle factors may be interrelated and have cumulative effects, the other further  
109 focusing on the impact of a combined lifestyle on biological aging. Research focusing  
110 on healthy lifestyles has been conducted in Chinese(21, 22), American(23), and  
111 British populations(24) and has found that adherence to a healthy lifestyle is  
112 consistently associated with slower biological aging. However, most studies used one-  
113 time measurements of lifestyle factors as exposure and could not examine the impact  
114 of lifestyle changes on BA. In addition, research has often focused on epigenetic age  
115 and PhenoAge. The Klemera-Doubal method of biological age (KDM-BA) has been  
116 shown to perform well in predicting frailty and mortality and is used to identify the  
117 biological ages of organ systems(8, 25). Therefore, KDM-BA, based on clinical-lab  
118 data sets, offers accessible and cost-effective means for aging identification and  
119 intervention. Besides, no study has been conducted to analyze further the relative  
120 contributions of multiple lifestyle changes on various organ systems BA, which could  
121 identify important influences on the comprehensive and organ-specific biological  
122 aging to prioritize interventions, especially in developing regions with limited  
123 resources. Southwest China is characterized by multi-ethnicity, unbalanced internal  
124 development, and rapid aging, making identifying priority intervenable aging factors  
125 important.

126 Therefore, based on the China Multi-Ethnic Cohort Study (CMEC), this study  
127 aimed to develop potential BAs for organ systems using the KDM algorithm, explore

128 how lifestyle changes correlate with both comprehensive and organ-specific BAs, and  
129 further investigate the relative contributions of individual lifestyle components in  
130 southwest China.

## 131 **Methods**

### 132 **Study Population**

133 This study used data from the CMEC baseline and repeated surveys for analysis. The  
134 CMEC adopted a multi-stage stratified cluster sampling, with participants covering  
135 five provinces and seven ethnic groups (Tibetan, Yi, Miao, Bai, Bouyei, Dong, and  
136 Han) in Southwest China, representing the local regional and ethnic characteristics.  
137 The baseline survey of the CMEC was conducted between May 2018 and September  
138 2019, and the repeated survey was conducted between August 2020 and June 2021.  
139 The CMEC baseline survey included 99,556 individuals, with 10% of the sample  
140 population selected for the repeated survey. Details of the CMEC procedures and  
141 methodology have been described in our previous study(26). Participants' personal  
142 interviews, physical examinations, and clinical laboratory measurements were  
143 completed using a uniform standardized operating procedure in both surveys. The  
144 study protocol was approved by the Sichuan University Medical Ethical Review  
145 Board [ID: K2016038, K2020022]. All participants in the study signed an informed  
146 consent form before the investigation.

147 In this study, we included participants with available information on lifestyle,  
148 measurements for calculating BA required, and covariates. We excluded individuals  
149 with missing data to calculate BA and individuals with incomplete data on lifestyle



150 and covariates for participants at the baseline and repeated survey. Finally, 8396  
151 individuals aged 30-79 were included as the full set in the longitudinal analysis after  
152 matching (Supplementary Figure 1).

### 153 **Definition of lifestyle factors**

154 Considering previous studies, the healthy lifestyle index (HLI) was established  
155 through five lifestyle factors: smoking, alcohol consumption, diet, exercise, and sleep.  
156 Data for the lifestyle factors were obtained from the questionnaire, and the simplified  
157 FFQ was assessed by trained staff.

158 The definitions of a healthy lifestyle are as follows. Smoking was categorized  
159 according to smoking status, and never smoking was defined as healthy. For alcohol  
160 consumption, according to the findings of recent research on alcohol consumption in  
161 Chinese populations, being healthy was defined as being a non-regular drinker  
162 (drinking frequency less than once a week)(27). For diet, since the Mediterranean diet  
163 (MED) is currently the most internationally recognized healthy dietary pattern and has  
164 widely and robustly beneficial effects(28), we used the alternative Mediterranean diet  
165 (aMED) to evaluate dietary quality, with details shown in the supplemental material.  
166 Since the HLI already contained a drinking component, we removed the drinking item  
167 in the aMED, which had a score range of 7-35. We defined individuals with aMED  
168 scores  $\geq$  population median as healthy diets. More details on the calculation of aMED  
169 can be found in previous studies(29). For exercise, based on how often participants  
170 participated in physical activity in their leisure time during the past year, regular  
171 exercise (“12 times/week”, “3–5 times/week,” or “daily or almost every day”) was

172 categorized as healthy(30). For sleep, a sleep duration of 7-8 hours was defined as  
173 healthy sleep based on previous studies(31).

174 In addition, to comprehensively evaluate the impact of overall healthy lifestyle  
175 level on outcomes, we further constructed the HLI in this study. For each lifestyle, we  
176 assign 1 point to health and 0 points to the opposite. The HLI was calculated by  
177 directly adding up the five lifestyle scores, ranging from 0-5, with a higher score  
178 representing an overall healthier lifestyle. We then transformed HLI into a  
179 dichotomous variable in this study, where a score of 4-5 for HLI was considered a  
180 healthy lifestyle, and a score of 0-3 was considered an unfavorable lifestyle that could  
181 be improved.

## 182 **Covariate Assessment**

183 The selection of covariates is based on prior literature review and previously  
184 constructed directed acyclic graphs (Supplementary Figure 2). Covariates included  
185 age, sex, ethnicity (majority, minority), urbanicity (rural, urban), education (No  
186 schooling, primary school, Middle/high school, College/university), occupation  
187 (primary industry practitioner, secondary industry practitioner, tertiary industry  
188 practitioner, unemployed), marital status (married/cohabiting, not  
189 married/cohabiting), total energy intake (kcal/day), depression symptoms, anxiety  
190 symptoms, menopausal status in women (premenopausal, perimenopausal,  
191 postmenopausal), beverage intake (never, former consumer, currently consuming),  
192 dietary supplement intake, self-reported doctor-diagnosed diseases of diabetes,  
193 cardiovascular disease (CVD), and cancer. Among these, sex, ethnicity, urbanicity,

194 and education were considered time-invariant variables, while other variables were  
195 considered time-varying.

## 196 **BA Construction**

197 The comprehensive BA and BAs across multiple organ systems were estimated using  
198 the Klemmera-Doubal method(32), which is well-validated in the Chinese  
199 population(33). We selected indicators for constructing BA from clinical-lab data sets  
200 measured in the baseline and repeated surveys of the CMEC, filtering based on a  
201 missing rate of less than 30%. Based on previous studies, these indicators were  
202 categorized into five systems based on the organ/system function they represent:  
203 cardiopulmonary, metabolic, liver, renal, and immune systems, as detailed in the  
204 Supplementary Table 2(8, 9). Thus, we developed a comprehensive BA alongside five  
205 organ system-specific BAs: cardiopulmonary BA, metabolic BA, liver BA, renal BA,  
206 and immune BA. The selection process was then completed following the  
207 methodology used in our previous studies, which are detailed in the supplementary  
208 materials.

209 After finishing the screening process, 15 measures were used in constructing the  
210 comprehensive BA, which were systolic blood pressure (SBP), waist-to-hip ratio  
211 (WHR), peak expiratory flow (PEF),  $\gamma$ -Glutamyl transpeptidase (GGT), albumin  
212 (ALB), low-density lipoprotein cholesterol (LDL-CH), high-density lipoprotein  
213 cholesterol (HDL-CH), triglyceride (TG), aspartate aminotransferase (AST),  
214 creatinine (Cr), alkaline phosphatase (ALP), urea, mean corpuscular volume (MCV),  
215 glycosylated hemoglobin (HBA1C) and platelet count (PLT). The cardiopulmonary

216 BA was assessed using SBP and PEF; the metabolic BA was assessed using LDL-CH,  
217 HDL-CH, HBA1C, TG and WHR; the liver BA was assessed using AST, GGT, ALP,  
218 ALB; the renal BA was assessed using Cr and urea, and the immune BA was assessed  
219 using PLT and MCV. Using the above measures, we calculated each BA in the male  
220 and female populations separately using the KDM algorithm. To quantify variation in  
221 biological aging between participants, we calculated BA acceleration, which is the  
222 difference between each BA and CA simultaneously.

### 223 **BA Validation**

224 To assess the performance of the newly developed BAs of multiple organ systems, we  
225 performed a validation analysis to evaluate the relationships between them and organ-  
226 specific diseases. Given the short follow-up period in the CMEC study, we conducted  
227 a cross-sectional analysis using baseline data. We separately examined the  
228 associations between the comprehension BA and CVD, diabetes, cancer,  
229 cardiopulmonary BA and CVD and chronic bronchitis, the metabolic BA and CVD  
230 and diabetes, the liver BA and chronic hepatitis or cirrhosis, the immune BA and  
231 rheumatoid arthritis. For interpretability, we simultaneously standardized and  
232 classified each BA acceleration into categories ( $|\text{BA acceleration}| \leq 1$ , BA acceleration  
233  $< -1$ , and BA acceleration  $> 1$ ). We used logistic regression to assess the associations  
234 between each continuous and categorized BA ( $|\text{BA acceleration}| \leq 1$  serving as the  
235 reference group) and the diseases. Since the values of BA acceleration of the  
236 cardiopulmonary BA were small, it was not processed as categorical variables. The  
237 model was additionally adjusted for five healthy lifestyle factors based on the

238 covariates. The comprehensive BA constructed in the CMEC study has been validated  
239 to better reflect age-related disease and frailty(34). After completing the validation  
240 analysis, we selected BAs reflecting aging and related diseases for further analysis.

#### 241 **Statistical analysis**

242 We described changes in lifestyle between the two waves of surveys, where changes  
243 were categorized as becoming healthier, remaining unchanged, and becoming  
244 unhealthier. For single lifestyles, remaining unchanged indicates that the factor has  
245 remained healthy or unhealthy at two surveys; becoming healthier suggests that it was  
246 unhealthy at baseline and became healthy on the repeated survey, and vice versa. For  
247 the HLI scores, no change indicates the same score in both surveys, a change to  
248 healthier implies a repeated survey score higher than the baseline score, and a shift in  
249 less healthy indicates a repeated survey score lower than the baseline score. The  
250 dichotomous HLI's change categorization was similar to the single lifestyle. The  
251 baseline characteristics of participants were described across categories in the  
252 dichotomized HLI, with continuous variables represented by median (Interquartile  
253 range, IQR) and categorical variables by proportions (Table 1).

254 We used the fixed effects model (FEM) to examine associations between each  
255 lifestyle factor and the acceleration of validated BAs for people who participated in  
256 both surveys. FEM is extensively applied in the analysis of panel data in the fields of  
257 sociology, economics, and public health research, where it serves to control for  
258 unobserved individual heterogeneity. The detailed methodology of the FEM is  
259 outlined in the supplementary materials. Because of the approximately 2-year interval

260 between the two CMEC waves, we assumed that the short-term effect of lifestyle  
261 changes on biological aging was linear during this period. Multivariable-adjusted  
262 models were constructed to account for potential confounding, including time-varying  
263 and time-invariant variables and CA. We incorporated five lifestyle factors as  
264 exposures simultaneously into the model, while the continuous and binary HLI were  
265 entered into the model as exposures separately. Since the BAs we analyzed may  
266 potentially measure overlapping aspects of human aging, we did not correct for  
267 multiple comparisons (Supplementary Figure 3).

268 To further obtain the relative contribution of each lifestyle factor on validated  
269 comprehension and organ systems BA, the present study used data from two waves  
270 for quantile G-computation (QGC) analysis. QGC is a statistical technique for  
271 evaluating the effects of mixture exposures, capable of discerning positive and  
272 negative influences, and is widely used in environmental epidemiology research(35).  
273 Additionally, subgroup analyses for continuous and categorized HLI and each  
274 validated BA were conducted across sex (male vs. female), baseline age (<60 vs.≥60),  
275 ethnicity (majority vs. minority), urbanicity (rural vs. urban), baseline BA acceleration  
276 (<0 vs. ≥0), and baseline disease status (free of diabetes, CVD, and cancer vs. either  
277 one). The heterogeneity between strata was assessed using the Q test ( $\alpha = 0.1$  was  
278 considered significant heterogeneity).

279 We performed sensitivity analyses concerning exposure definitions, confounders,  
280 and our analysis method. First, we repeated the analysis of the association between  
281 lifestyles and BAs using a standard FEM, with adjustments made only for time-

282 varying variables. Second, we used alternative common health criteria for each  
283 lifestyle factor separately, and we repeated the FEM analyses and QGC analyses by  
284 replacing the health definition of one lifestyle factor at a time. Exposure definitions  
285 for the main analyses and sensitivity analyses are shown in the Supplementary Table  
286 1. Third, we did not adjust for body mass index (BMI) in models because some  
287 studies have suggested that BMI may be an intermediate factor between lifestyles and  
288 health outcomes. However, in the sensitivity analysis, we additionally adjusted for  
289 BMI in the FEM and QGC analyses models. Statistical analyses were performed  
290 using R Project for Statistical Computing version 4.1.1 (Vienna, Austria).

## 291 **Results**

### 292 **Lifestyle changes between two waves in CMEC**

293 Figure 1 shows the changes in lifestyle factors in the study population from baseline  
294 to repeated surveys. For the HLI (range), more than 60 percent of participants  
295 experienced a lifestyle change. For the HLI (category), about 30 percent of  
296 participants changed lifestyle categories, and the percentages were close for both  
297 types. For each lifestyle factor, the proportion of individuals who remained unchanged  
298 during the two surveys was higher than that of individuals who changed, with  
299 smoking and drinking having the highest proportion of unchanged individuals at more  
300 than 90 percent, indicating that these two lifestyle factors are less likely to change.  
301 Sleep and diet behaviors had a relatively high percentage of change, accounting for  
302 over one-third, and exercise had a slightly lower rate of change, nearly 30 percent.

### 303 **Construction and validation of organ systems BAs**

304 The results of the cross-sectional analysis between the comprehensive and organ  
305 systems BAs and diseases are presented in Supplementary Table 3. Accelerated  
306 comprehensive BA was positively correlated with an increased risk of CVD and  
307 diabetes. The cardiopulmonary BA, the liver BA, and the metabolic BA were each  
308 linked to an increased risk of their respective diseases. An increase in  
309 cardiopulmonary BA acceleration was associated with a higher risk of cardiovascular  
310 diseases but not with chronic obstructive pulmonary disease. Per 1-SD increase of the  
311 liver BA was associated with a higher risk of chronic hepatitis or cirrhosis (OR 1.28,  
312 95% *CI* 1.23-1.33), and per 1-SD increase in metabolic BA corresponded to a higher  
313 risk of CVD (OR 1.21, 95% *CI* 1.19-1.23) and diabetes (OR 3.23, 95% *CI* 3.12-3.34).  
314 However, no expected associations with related diseases were observed for immune  
315 BA. Finally, we concluded that the cardiopulmonary BA, the metabolic BA, and the  
316 liver BA could reflect organ-specific disease and were included in subsequent  
317 analyses along with comprehensive BA.

### 318 **Characteristics of participants by HLI categories**

319 Table 1 reports the characteristics of populations categorized by dichotomous HLI at  
320 baseline and the repeated survey. In this study, 3461 individuals had a healthy  
321 lifestyle, and individuals with an unfavorable lifestyle accounted for a higher  
322 proportion (n (%) = 4935 (58.8%)) at baseline. There was a slight decrease in the  
323 proportion of people with a healthy lifestyle at the time of the repeated survey (n (%)  
324 = 3275 (39.0%)), while 5049 (61.0%) had an unfavorable lifestyle.

325 Since the lifestyle categories of participants may change, the distribution of



326 population characteristics between baseline and repeated surveys changes slightly but  
327 is generally similar. Participants with healthy lifestyles were more likely to be female,  
328 in urban areas, Han Chinese, with higher levels of education, less likely to be  
329 employed in primary and secondary industries, more likely to be premenopausal and  
330 with dietary supplement intake, less likely to have anxiety, depression, and younger in  
331 biological age, as shown by the lower median of BA and BA acceleration of the  
332 comprehensive, cardiopulmonary, metabolic and liver BA. For major diseases, the  
333 proportion of people with a healthier lifestyle was closer to that of people with an  
334 unfavorable lifestyle in both surveys.

### 335 **Associations of lifestyle factors and HLI changes with BAs acceleration and** 336 **relative contributions**

337 Table 2 shows the associations of individual lifestyle factors and continuous and  
338 dichotomous HLI with all validated BAs acceleration. For comprehensive BA, a  
339 significant negative association was found between HLI and accelerated biological  
340 aging, with a mean change of -0.19 (95% *CI*: -0.34, -0.03) in the BA acceleration for a  
341 healthier lifestyle change. Results showed that a change of -0.15 (95% *CI*: -0.29, -  
342 0.00) in the comprehensive BA acceleration was associated with a shift in diet. For the  
343 cardiopulmonary BA, metabolic BA, and liver BA, the HLI was associated with a  
344 reduction in each BA acceleration, although some of the results were not statistically  
345 significant. Shift in smoking was related to a change in metabolic BA acceleration of -  
346 0.54 (95%*CI*: -0.97, -0.11), and the results of individual lifestyle factors and the  
347 cardiopulmonary BA as well as the liver BA did not reach statistical significance.

348 The relative contribution of each lifestyle factor on the comprehensive and the  
349 cardiopulmonary BA, the metabolic BA, and the liver BA acceleration based on the  
350 QGC method are shown in Figure 2. For comprehensive BA, the relative contribution  
351 of diet was 0.24. Although the relative contributions of drinking and exercise were  
352 slightly higher than that of diet, they were not statistically significant. For metabolic  
353 BA, smoking was the major contributor, weighting 0.55. For cardiopulmonary BA  
354 and liver BA, exercise and alcohol consumption were the most contributing  
355 components in all lifestyle factors separately, although the results were statistically  
356 significant.

### 357 **Results of subgroup analysis and sensitivity analysis**

358 Figure 3 shows the results of the subgroup analyses of the HLI range and category  
359 with the comprehensive BA acceleration. For the HLI range, the direction of the  
360 association was consistent with the whole population, with statistical significance  
361 only in females, the younger, minorities, rural residents, accelerated BA group, and no  
362 baseline disease populations. The negative association was stronger in minorities  
363 (Heterogeneity test  $P = 0.028$ ). For categorized HLI and AA, the direction of the  
364 association was broadly consistent with the whole population. The continued HLI  
365 results for cardiopulmonary BA showed a stronger negative association in females  
366 (Heterogeneity test  $P = 0.045$ , Supplementary Figure 4). For metabolic BA and liver  
367 BA, no differences were observed between different subgroups (Supplementary  
368 Figure 5 and 6).

369 We conducted a series of sensitivity analyses to test the robustness of the results.

370 Firstly, the results of the standard FEM analysis were broadly consistent with the  
371 primary analysis (Supplementary Table 4 and Supplementary Figure 7). For the  
372 comprehensive BA, exercise along with diet was negatively correlated with BA  
373 acceleration, and in the main analysis, exercise was borderline statistically significant.  
374 While the results of some lifestyles for liver function BA changed, none were  
375 statistically significant. Secondly, changing the definition of health for any lifestyle  
376 factor had negative association estimates with all BAs acceleration for the HLI.  
377 Although the effect size of some lifestyle factors changed, most of the results  
378 remained stable. Full results are reported in Supplementary Table 5 and  
379 Supplementary Figure 8-11. Thirdly, with additional adjustment for BMI, the  
380 direction and magnitude of the associations were generally consistent with the main  
381 analysis results (Supplementary Table 6 and Supplementary Figure 12). In summary,  
382 the sensitivity analysis results aligned with the main results and were relatively  
383 robust.

## 384 **Discussion**

385 This study examined the association of lifestyle changes on biological aging in the  
386 Southwest Cohort based on two surveys. About two-thirds of the participants were  
387 observed to change their HLI scores between the two surveys. The health alterations  
388 in HLI showed a protective association between accelerated aging of comprehension  
389 and each organ system. The relative contribution of diet was the largest among all  
390 lifestyle components for the comprehensive BA, and smoking contributed the most to

391 the metabolic BA, respectively, suggesting that these factors are particularly crucial in  
392 specifically decelerating the pace of biological aging.

393 In our study, the prevalence of healthy lifestyles was higher than the prevalence  
394 reported by research based on the China Kadoorie Biobank study and the China  
395 Nutrition and Health Surveillance (36), with those with 4-5 lifestyle factors  
396 accounting for 41.2% and 39.0% at baseline and repeated surveys, respectively. The  
397 relatively high prevalence of healthy lifestyles in this study may be explained by the  
398 recent establishment of the CMEC and an overall trend towards healthier lifestyles,  
399 alongside different lifestyle standards. Furthermore, we noted lifestyle changes in our  
400 research and subsequently employed the FEM for analysis based on this observation.  
401 Lifestyle may be influenced by environmental factors such as urbanization and  
402 individual characteristics such as health awareness, and thus, lifestyle may change  
403 over time, yet fewer studies have focused on this(37). The high proportion of changes  
404 occurring in sleep, exercise, and diet here suggests that they may be more variable and  
405 relatively easy to intervene. For overall health styles, there was a higher proportion of  
406 changes in lifestyle scores but fewer shifts from unhealthy to healthy or healthy to  
407 unhealthy. That is, while lifestyle fluctuates over time, it is less likely to change  
408 substantially, consistent with the findings of another study(14, 38).

409 Our study reveals that healthy lifestyle shifts can slow the pace of comprehensive  
410 BA, with diet being a crucial component. Both the HLI range and category showed  
411 robust protective associations. Although there are differences in lifestyle definitions  
412 and aging indicators, available studies consistently find that healthier lifestyles are

413 associated with lower aging acceleration(21, 23, 39, 40). Despite limited research on  
414 how lifestyle components contribute to aging, our study provides additional evidence.  
415 We used the widely recommended aMED as a healthy dietary criterion, which  
416 includes rich plant foods, olive oil, moderate fish, and red wine, some of which may  
417 slow aging and promote health(41). In our study, the association between exercise and  
418 comprehensive BA was nearly statistically significant. Higher levels of exercise have  
419 been shown to be associated with a lower incidence of chronic disease and a longer  
420 lifespan(42, 43). Diet and exercise may slow aging through beneficial DNA  
421 methylation changes(44), modification of gut microbiota(45), and reducing oxidative  
422 stress and inflammation(46, 47), collectively enhancing fitness and slowing the aging  
423 pace. Combining the previous randomized controlled trial with our findings, the  
424 evidence suggested that diet and exercise are easily modifiable anti-aging factors in  
425 the real world(13).

426 Another contribution of our study is presenting evidence of different lifestyle  
427 factors influencing multi-organ BA, which was constructed and validated for  
428 Southwest China. The HLI still played a protective role against aging across various  
429 organ systems, yet the components contributing most varied specifically. Biological  
430 aging varies across organ systems, and the associations with lifestyle may differ.  
431 Change in smoking played a significant role in metabolic aging. The current study of  
432 the British population has also identified smoking as a factor influencing aging across  
433 multiple organ systems(9). The Coronary Artery Risk Development in Young Adults  
434 Study revealed that smoking contributed to epigenetic aging acceleration by

435 83.5%(39). The variation in results could be attributed to the fact that current studies  
436 offer evidence of cumulative exposure to smoking(17, 21), while our research focuses  
437 on short-term changes. Short-term smoking behavior changes may be sufficient to  
438 impact metabolism aging but do not significantly affect the comprehensive BA.  
439 Existing research has shown that the metabolic and immune systems can impact  
440 various systems through inter-organ aging pathways, making it essential to focus on  
441 modifiable factors of metabolic system aging. Hence, we discovered that smoking  
442 could serve as an intervention target for organ system aging, holding the potential to  
443 delay the onset of diseases in specific systems, thereby extending a healthy lifespan.

444 In subgroup analysis, we discovered that negative associations of HLI and the  
445 comprehensive BA acceleration varied among ethnic groups. No observed differences  
446 in HLI category change between ethnic groups, potentially due to insufficient  
447 statistical power. Compared to the majority group, the minority may have lower  
448 socioeconomic status and less health awareness, leading to less management of  
449 lifestyle factors and, consequently, stronger associations when changes in these  
450 factors occur. Given that biological aging is a cause of various long-term outcomes,  
451 these results highlight the importance of conducting interventions among minority  
452 groups in Southwest China.

### 453 **Strengths and limitations**

454 Unlike previous studies that used one measurement of lifestyle or biological age, our  
455 study utilized longitudinal data from two waves of the CMEC study, which measured  
456 the longitudinal changes in lifestyle behaviors and BA of the body and multi-organ

457 systems. We also assessed the impact of alterations in healthy lifestyle factors on  
458 validated BAs and further characterized the relative contributions. This  
459 comprehensive approach offers the latest evidence for the early prevention and  
460 targeted behavioral interventions of organ-specific aging and related diseases in  
461 southwestern China.

462 This study has certain limitations. Firstly, our construction of multi-organ BA  
463 was limited by the clinical lab data measures, preventing the development of BAs for  
464 some organ systems like the brain. Additionally, we could not fully capture specific  
465 aging processes of the immune system because of few immune-related indicators and  
466 the possible omission of critical markers. However, we used routinely detected  
467 biomarkers to construct the BA, which are cost-effective and easily implemented.  
468 Therefore, this multi-organ BA is suitable for broad adoption in primary prevention,  
469 especially in developing areas like Southwestern China. Besides, the CMEC had a  
470 limited range of diseases collected, precluding all BAs validation. Thus, we finally  
471 included only those BAs that could be validated for further analysis. Secondly, as an  
472 observational study, we established a prospective association between healthy  
473 lifestyles and accelerated aging, yet it does not confirm a causal relationship. Thirdly,  
474 the CMEC was established in 2018 with only data from two survey waves, which  
475 highlights the drawback of reduced statistical power of FEM. Future research could  
476 build on long-term, multi-wave follow-ups, employing FEM analysis based on  
477 repeatedly collected data to derive more reliable causal effect estimates. Fourthly,  
478 there is no gold standard for measuring biological aging. However, the KDM-BA

479 method used in this study has the advantage of accurately predicting aging-related  
480 outcomes, and it has been validated in our study population(34). Lastly, our study is  
481 based on a population from the Southwestern China which could limit the  
482 generalizability of our findings. However, the Southwestern China is characterized by  
483 its diverse ethnicities and lower developmental level, with few studies addressing  
484 biological aging there. This research may provide crucial information for  
485 interventions in other less-developed regions.

## 486 **Conclusions**

487 In summary, within the Southwest China population, we observed that healthy  
488 lifestyle changes were inversely related to comprehensive and organ-specific  
489 accelerated biological aging, with diet and smoking making the most significant  
490 contributions to the comprehensive BA and metabolic BA separately. These findings  
491 underscore the potential for lifestyle interventions to slow the aging pace and identify  
492 priority intervention targets to various organ-specific aging in less-developed regions.

## 493 **Acknowledgements**

494 We sincerely thank all the participants and staff of the CMEC study. We  
495 gratefully acknowledge Professor Xiaosong Li, the former principal investigator of  
496 CMEC research, for his leadership and tremendous contribution to the establishment  
497 of CMEC. Professor Li passed away in 2019.

## 498 **Authors' contributions**

499 DT, JY and XX designed the study. YZ and DT analyzed the data and drafted the  
500 paper. All other authors were involved in the collection of the data. All authors made



501 significant contributions to drafting and revising the manuscript and have approved  
502 the final version for publication.

### 503 **Conflicts of Interest**

504 The authors declare that they have no potential conflicts of interest.

### 505 **Data availability**

506 Data described in the manuscript, code book, and analytic code will be made available  
507 by contacting the corresponding author.

### 508 **References**

- 509 1. ECONOMIC UNDF, AFFAIRS. S. World population prospects 2022:  
510 Summary of results: UN, 2023.
- 511 2. Pot AM, Oliveira D, Hoffman J. Towards healthy ageing in China: shaping  
512 person-centred long-term care. *Lancet*. 2022;400(10367):1905-6. doi:  
513 10.1016/s0140-6736(22)02361-3.
- 514 3. Kennedy BK, Berger SL, Brunet A, Campisi J, Cuervo AM, Epel ES, et al.  
515 Geroscience: linking aging to chronic disease. *Cell*. 2014;159(4):709-13. doi:  
516 10.1016/j.cell.2014.10.039.
- 517 4. Hamczyk MR, Nevado RM, Baretino A, Fuster V, Andrés V. Biological  
518 Versus Chronological Aging: JACC Focus Seminar. *J Am Coll Cardiol*.  
519 2020;75(8):919-30. doi: 10.1016/j.jacc.2019.11.062.
- 520 5. Schaum N, Lehallier B, Hahn O, Pálovics R, Hosseinzadeh S, Lee SE, et al.  
521 Ageing hallmarks exhibit organ-specific temporal signatures. *Nature*.  
522 2020;583(7817):596-602. doi: 10.1038/s41586-020-2499-y.

- 523 6. Jylhävä J, Pedersen NL, Hägg S. Biological Age Predictors. *EBioMedicine*.  
524 2017;21:29-36. doi: 10.1016/j.ebiom.2017.03.046.
- 525 7. Li X, Ploner A, Wang Y, Magnusson PK, Reynolds C, Finkel D, Pedersen NL,  
526 Jylhävä J, Hägg S. Longitudinal trajectories, correlations and mortality  
527 associations of nine biological ages across 20-years follow-up. *Elife*. 2020;9.  
528 doi: 10.7554/eLife.51507.
- 529 8. Nie C, Li Y, Li R, Yan Y, Zhang D, Li T, et al. Distinct biological ages of  
530 organs and systems identified from a multi-omics study. *Cell Rep*.  
531 2022;38(10):110459. doi: 10.1016/j.celrep.2022.110459.
- 532 9. Tian YE, Cropley V, Maier AB, Lautenschlager NT, Breakspear M, Zalesky A.  
533 Heterogeneous aging across multiple organ systems and prediction of chronic  
534 disease and mortality. *Nat Med*. 2023;29(5):1221-31. doi: 10.1038/s41591-  
535 023-02296-6.
- 536 10. Bauer SR, Newman JC. Interpreting Geroscience-Guided Biomarker Studies.  
537 *JAMA Intern Med*. 2022;182(3):300-2. doi:  
538 10.1001/jamainternmed.2021.7812.
- 539 11. Belsky DW, Caspi A, Houts R, Cohen HJ, Corcoran DL, Danese A, et al.  
540 Quantification of biological aging in young adults. *Proc Natl Acad Sci U S A*.  
541 2015;112(30):E4104-10. doi: 10.1073/pnas.1506264112.
- 542 12. Elliott ML, Caspi A, Houts RM, Ambler A, Broadbent JM, Hancox RJ, et al.  
543 Disparities in the pace of biological aging among midlife adults of the same  
544 chronological age have implications for future frailty risk and policy. *Nat*

- 545 Aging. 2021;1(3):295-308. doi: 10.1038/s43587-021-00044-4.
- 546 13. Fiorito G, Caini S, Palli D, Bendinelli B, Saieva C, Ermini I, et al. DNA  
547 methylation-based biomarkers of aging were slowed down in a two-year diet  
548 and physical activity intervention trial: the DAMA study. *Aging Cell*.  
549 2021;20(10):e13439. doi: 10.1111/accel.13439.
- 550 14. Han Y, Hu Y, Yu C, Guo Y, Pei P, Yang L, et al. Lifestyle, cardiometabolic  
551 disease, and multimorbidity in a prospective Chinese study. *Eur Heart J*.  
552 2021;42(34):3374-84. doi: 10.1093/eurheartj/ehab413.
- 553 15. Zhang YB, Chen C, Pan XF, Guo J, Li Y, Franco OH, Liu G, Pan A.  
554 Associations of healthy lifestyle and socioeconomic status with mortality and  
555 incident cardiovascular disease: two prospective cohort studies. *Bmj*.  
556 2021;373:n604. doi: 10.1136/bmj.n604.
- 557 16. Henry A, Katsoulis M, Masi S, Fatemifar G, Denaxas S, Acosta D, Garfield V,  
558 Dale CE. The relationship between sleep duration, cognition and dementia: a  
559 Mendelian randomization study. *Int J Epidemiol*. 2019;48(3):849-60. doi:  
560 10.1093/ije/dyz071.
- 561 17. Klopach ET, Carroll JE, Cole SW, Seeman TE, Crimmins EM. Lifetime  
562 exposure to smoking, epigenetic aging, and morbidity and mortality in older  
563 adults. *Clin Epigenetics*. 2022;14(1):72. doi: 10.1186/s13148-022-01286-8.
- 564 18. Kresovich JK, Martinez Lopez AM, Garval EL, Xu Z, White AJ, Sandler DP,  
565 Taylor JA. Alcohol Consumption and Methylation-Based Measures of  
566 Biological Age. *J Gerontol A Biol Sci Med Sci*. 2021;76(12):2107-11. doi:

- 567 10.1093/gerona/glab149.
- 568 19. Kresovich JK, Park YM, Keller JA, Sandler DP, Taylor JA. Healthy eating  
569 patterns and epigenetic measures of biological age. *Am J Clin Nutr.*  
570 2022;115(1):171-9. doi: 10.1093/ajcn/nqab307.
- 571 20. Gao X, Huang N, Guo X, Huang T. Role of sleep quality in the acceleration of  
572 biological aging and its potential for preventive interaction on air pollution  
573 insults: Findings from the UK Biobank cohort. *Aging Cell.*  
574 2022;21(5):e13610. doi: 10.1111/accel.13610.
- 575 21. Wang C, Guan X, Bai Y, Feng Y, Wei W, Li H, et al. A machine learning-based  
576 biological aging prediction and its associations with healthy lifestyles: the  
577 Dongfeng-Tongji cohort. *Ann N Y Acad Sci.* 2022;1507(1):108-20. doi:  
578 10.1111/nyas.14685.
- 579 22. Liang X, Zhang WS, Jin YL, Jiang CQ, Zhu F, Cheng KK, Lam TH, Xu L.  
580 Association of Multi-Dimensional Factors with Accelerating Age and  
581 Constructing a Healthy Lifestyle Index: Guangzhou Biobank Cohort Study.  
582 *Gerontology.* 2023;69(6):737-47. doi: 10.1159/000528760.
- 583 23. Thomas A, Belsky DW, Gu Y. Healthy Lifestyle Behaviors and Biological  
584 Aging in the U.S. National Health and Nutrition Examination Surveys 1999-  
585 2018. *J Gerontol A Biol Sci Med Sci.* 2023;78(9):1535-42. doi:  
586 10.1093/gerona/glad082.
- 587 24. Yang G, Cao X, Li X, Zhang J, Ma C, Zhang N, et al. Association of  
588 Unhealthy Lifestyle and Childhood Adversity With Acceleration of Aging

- 589           Among UK Biobank Participants. *JAMA Netw Open*. 2022;5(9):e2230690.  
590           doi: 10.1001/jamanetworkopen.2022.30690.
- 591   25.   Zhong X, Lu Y, Gao Q, Nyunt MSZ, Fulop T, Monterola CP, Tong JC, Larbi  
592           A, Ng TP. Estimating Biological Age in the Singapore Longitudinal Aging  
593           Study. *J Gerontol A Biol Sci Med Sci*. 2020;75(10):1913-20. doi:  
594           10.1093/gerona/glz146.
- 595   26.   Zhao X, Hong F, Yin J, Tang W, Zhang G, Liang X, Li J, Cui C, Li X. Cohort  
596           Profile: the China Multi-Ethnic Cohort (CMEC) study. *Int J Epidemiol*.  
597           2021;50(3):721-1. doi: 10.1093/ije/dyaa185.
- 598   27.   Millwood IY, Im PK, Bennett D, Hariri P, Yang L, Du H, et al. Alcohol intake  
599           and cause-specific mortality: conventional and genetic evidence in a  
600           prospective cohort study of 512 000 adults in China. *Lancet Public Health*.  
601           2023;8(12):e956-e67. doi: 10.1016/s2468-2667(23)00217-7.
- 602   28.   Mazza E, Ferro Y, Pujia R, Mare R, Maurotti S, Montalcini T, Pujia A.  
603           Mediterranean Diet In Healthy Aging. *J Nutr Health Aging*. 2021;25(9):1076-  
604           83. doi: 10.1007/s12603-021-1675-6.
- 605   29.   Xiao X, Qin Z, Lv X, Dai Y, Ciren Z, Yangla Y, et al. Dietary patterns and  
606           cardiometabolic risks in diverse less-developed ethnic minority regions:  
607           results from the China Multi-Ethnic Cohort (CMEC) Study. *Lancet Reg  
608           Health West Pac*. 2021;15:100252. doi: 10.1016/j.lanwpc.2021.100252.
- 609   30.   Luo M, Gupta N, Holtermann A, Stamatakis E, Ding D. Revisiting the  
610           'physical activity paradox' in a Chinese context: Occupational physical activity

- 611 and mortality in 142,302 urban working adults from the China Kadoorie  
612 Biobank study. *Lancet Reg Health West Pac.* 2022;23:100457. doi:  
613 10.1016/j.lanwpc.2022.100457.
- 614 31. Chaput JP, Dutil C, Featherstone R, Ross R, Giangregorio L, Saunders TJ, et  
615 al. Sleep duration and health in adults: an overview of systematic reviews.  
616 *Appl Physiol Nutr Metab.* 2020;45(10 (Suppl. 2)):S218-s31. doi:  
617 10.1139/apnm-2020-0034.
- 618 32. Klemmera P, Doubal S. A new approach to the concept and computation of  
619 biological age. *Mech Ageing Dev.* 2006;127(3):240-8. doi:  
620 10.1016/j.mad.2005.10.004.
- 621 33. Chen L, Zhang Y, Yu C, Guo Y, Sun D, Pang Y, et al. Modeling biological age  
622 using blood biomarkers and physical measurements in Chinese adults.  
623 *EBioMedicine.* 2023;89:104458. doi: 10.1016/j.ebiom.2023.104458.
- 624 34. Xiang Y, Xu H, Chen H, Tang D, Huang Z, Zhang Y, et al. Tea consumption  
625 and attenuation of biological aging: a longitudinal analysis from two cohort  
626 studies. *Lancet Reg Health West Pac.* 2024;42:100955. doi:  
627 10.1016/j.lanwpc.2023.100955.
- 628 35. Keil AP, Buckley JP, O'Brien KM, Ferguson KK, Zhao S, White AJ. A  
629 Quantile-Based g-Computation Approach to Addressing the Effects of  
630 Exposure Mixtures. *Environ Health Perspect.* 2020;128(4):47004. doi:  
631 10.1289/ehp5838.
- 632 36. Sun Q, Yu D, Fan J, Yu C, Guo Y, Pei P, et al. Healthy lifestyle and life

- 633 expectancy at age 30 years in the Chinese population: an observational study.  
634 Lancet Public Health. 2022;7(12):e994-e1004. doi: 10.1016/s2468-  
635 2667(22)00110-4.
- 636 37. Lao XQ, Ma WJ, Sobko T, Zhang YH, Xu YJ, Xu XJ, et al. Dramatic  
637 escalation in metabolic syndrome and cardiovascular risk in a Chinese  
638 population experiencing rapid economic development. BMC Public Health.  
639 2014;14:983. doi: 10.1186/1471-2458-14-983.
- 640 38. Zhou YF, Song XY, Pan XF, Feng L, Luo N, Yuan JM, Pan A, Koh WP.  
641 Association Between Combined Lifestyle Factors and Healthy Ageing in  
642 Chinese Adults: The Singapore Chinese Health Study. J Gerontol A Biol Sci  
643 Med Sci. 2021;76(10):1796-805. doi: 10.1093/gerona/glab033.
- 644 39. Kim K, Zheng Y, Joyce BT, Jiang H, Greenland P, Jacobs DR, Jr., et al.  
645 Relative contributions of six lifestyle- and health-related exposures to  
646 epigenetic aging: the Coronary Artery Risk Development in Young Adults  
647 (CARDIA) Study. Clin Epigenetics. 2022;14(1):85. doi: 10.1186/s13148-022-  
648 01304-9.
- 649 40. Simons RL, Ong ML, Lei MK, Klopach E, Berg M, Zhang Y, Philibert R,  
650 Gibbons FX, Beach SRH. Shifts in lifestyle and socioeconomic circumstances  
651 predict change-for better or worse-in speed of epigenetic aging: A study of  
652 middle-aged black women. Soc Sci Med. 2022;307:115175. doi:  
653 10.1016/j.socscimed.2022.115175.
- 654 41. Wang S, Li W, Li S, Tu H, Jia J, Zhao W, et al. Association between plant-

- 655 based dietary pattern and biological aging trajectory in a large prospective  
656 cohort. *BMC Med.* 2023;21(1):310. doi: 10.1186/s12916-023-02974-9.
- 657 42. Watts EL, Matthews CE, Freeman JR, Gorzelitz JS, Hong HG, Liao LM,  
658 McClain KM, Saint-Maurice PF, Shiroma EJ, Moore SC. Association of  
659 Leisure Time Physical Activity Types and Risks of All-Cause, Cardiovascular,  
660 and Cancer Mortality Among Older Adults. *JAMA Netw Open.*  
661 2022;5(8):e2228510. doi: 10.1001/jamanetworkopen.2022.28510.
- 662 43. Kankaanpää A, Tolvanen A, Bollepalli S, Leskinen T, Kujala UM, Kaprio J,  
663 Ollikainen M, Sillanpää E. Leisure-Time and Occupational Physical Activity  
664 Associates Differently with Epigenetic Aging. *Med Sci Sports Exerc.*  
665 2021;53(3):487-95. doi: 10.1249/mss.0000000000002498.
- 666 44. Galkin F, Kovalchuk O, Koldasbayeva D, Zhavoronkov A, Bischof E. Stress,  
667 diet, exercise: Common environmental factors and their impact on epigenetic  
668 age. *Ageing Res Rev.* 2023;88:101956. doi: 10.1016/j.arr.2023.101956.
- 669 45. Zhang L, Liu Y, Sun Y, Zhang X. Combined Physical Exercise and Diet:  
670 Regulation of Gut Microbiota to Prevent and Treat of Metabolic Disease: A  
671 Review. *Nutrients.* 2022;14(22). doi: 10.3390/nu14224774.
- 672 46. Aleksandrova K, Koelman L, Rodrigues CE. Dietary patterns and biomarkers  
673 of oxidative stress and inflammation: A systematic review of observational and  
674 intervention studies. *Redox Biol.* 2021;42:101869. doi:  
675 10.1016/j.redox.2021.101869.
- 676 47. El Assar M, Álvarez-Bustos A, Sosa P, Angulo J, Rodríguez-Mañas L. Effect



677 of Physical Activity/Exercise on Oxidative Stress and Inflammation in Muscle

678 and Vascular Aging. Int J Mol Sci. 2022;23(15). doi: 10.3390/ijms23158713.

679

680

681 **Tables**

682 **Table 1. Characteristics of participants in baseline and repeated surveys, based**  
 683 **on the categorized HLI<sup>1</sup>**

| Characteristic                     | Baseline HLI (category)            |                                | Follow up HLI (category)           |                                |
|------------------------------------|------------------------------------|--------------------------------|------------------------------------|--------------------------------|
|                                    | unfavorable<br>HLI = 0<br>N = 4935 | healthy<br>HLI = 1<br>N = 3461 | unfavorable<br>HLI = 0<br>N = 5121 | healthy<br>HLI = 1<br>N = 3275 |
|                                    | Age (years)                        | 52.00 [45.00, 60.00]           | 49.00 [43.00, 57.00]               | 53.75 [47.01, 62.24]           |
| Female (%)                         | 2511 (50.9)                        | 2666 (77.0)                    | 2685 (52.4)                        | 2492 (76.1)                    |
| Urbanicity (%)                     | 1472 (29.8)                        | 1525 (44.1)                    | 1527 (29.8)                        | 1470 (44.9)                    |
| Majority (%)                       | 2665 (54.0)                        | 2427 (70.1)                    | 2763 (54.0)                        | 2329 (71.1)                    |
| Education (%)                      |                                    |                                |                                    |                                |
| No schooling                       | 1506 (30.5)                        | 653 (18.9)                     | 1554 (30.3)                        | 605 (18.5)                     |
| Primary school                     | 1305 (26.4)                        | 721 (20.8)                     | 1377 (26.9)                        | 649 (19.8)                     |
| Middle/high school                 | 1764 (35.7)                        | 1525 (44.1)                    | 1780 (34.8)                        | 1509 (46.1)                    |
| College/university                 | 360 (7.3)                          | 562 (16.2)                     | 410 (8.0)                          | 512 (15.6)                     |
| Occupation (%)                     |                                    |                                |                                    |                                |
| Primary industry practitioner      | 1993 (40.4)                        | 820 (23.7)                     | 2093 (40.9)                        | 826 (25.2)                     |
| Secondary industry practitioner    | 335 (6.8)                          | 197 (5.7)                      | 396 (7.7)                          | 174 (5.3)                      |
| Tertiary industry practitioner     | 1699 (34.4)                        | 1671 (48.3)                    | 1736 (33.9)                        | 1462 (44.6)                    |
| Unemployed                         | 908 (18.4)                         | 773 (22.3)                     | 896 (17.5)                         | 813 (24.8)                     |
| Married (%)                        | 4396 (89.1)                        | 3111 (89.9)                    | 4595 (89.7)                        | 2966 (90.6)                    |
| Total energy intake (kcal/day)     | 1796.35 [1394.49, 2293.37]         | 1759.71 [1404.92, 2156.58]     | 1510.72 [1129.17, 1994.64]         | 1482.29 [1183.94, 1879.82]     |
| BMI (kg/m <sup>2</sup> )           | 24.29 [21.94, 26.79]               | 24.12 [22.04, 26.47]           | 24.61 [22.23, 27.05]               | 24.34 [22.31, 26.73]           |
| Depression symptom (%)             | 289 (5.9)                          | 117 (3.4)                      | 203 (4.0)                          | 86 (2.6)                       |
| Anxiety symptom (%)                | 335 (6.8)                          | 146 (4.2)                      | 212 (4.1)                          | 71 (2.2)                       |
| Menopausal status in women (%)     |                                    |                                |                                    |                                |
| Premenopausal                      | 1042 (41.5)                        | 1336 (50.1)                    | 914 (34.0)                         | 1099 (44.1)                    |
| Perimenopausal                     | 170 (6.8)                          | 189 (7.1)                      | 133 (5.0)                          | 109 (4.4)                      |
| Postmenopausal                     | 1299 (51.7)                        | 1141 (42.8)                    | 1638 (61.0)                        | 1284 (51.5)                    |
| Beverage (%)                       |                                    |                                |                                    |                                |
| Never                              | 4564 (92.5)                        | 3292 (95.1)                    | 4746 (92.7)                        | 3079 (94.0)                    |
| Former consumer                    | 23 (0.5)                           | 16 (0.5)                       | 27 (0.5)                           | 14 (0.4)                       |
| Currently consuming                | 348 (7.1)                          | 153 (4.4)                      | 348 (6.8)                          | 182 (5.6)                      |
| Dietary supplement intake (%)      | 711 (14.4)                         | 722 (20.9)                     | 724 (14.1)                         | 712 (21.7)                     |
| <b>Major diseases</b>              |                                    |                                |                                    |                                |
| Diabetes (%)                       | 245 (5.0)                          | 161 (4.7)                      | 275 (5.4)                          | 159 (4.9)                      |
| CVD (%)                            | 974 (19.7)                         | 628 (18.1)                     | 1054 (20.6)                        | 602 (18.4)                     |
| Cancer (%)                         | 36 (0.7)                           | 31 (0.9)                       | 39 (0.8)                           | 32 (1.0)                       |
| <b>Biological ages<sup>2</sup></b> |                                    |                                |                                    |                                |

|                                 |                      |                      |                      |                      |
|---------------------------------|----------------------|----------------------|----------------------|----------------------|
| Comprehensive BA                | 52.35 [43.90, 61.07] | 49.15 [40.19, 58.61] | 54.78 [46.48, 63.45] | 51.67 [42.74, 61.31] |
| Comprehensive BA acceleration   | 0.00 [-2.89, 3.00]   | -0.70 [-3.79, 2.73]  | 0.40 [-2.66, 3.48]   | -0.13 [-3.21, 3.25]  |
| Cardiopulmonary BA              | 51.86 [45.05, 60.40] | 49.10 [42.48, 56.89] | 53.79 [47.07, 62.14] | 50.82 [43.97, 59.18] |
| Cardiopulmonary BA acceleration | 0.08 [-0.47, 0.59]   | -0.03 [-0.65, 0.55]  | 0.04 [-0.56, 0.62]   | -0.08 [-0.71, 0.56]  |
| Metabolic BA                    | 52.87 [43.86, 61.78] | 49.42 [40.53, 59.01] | 55.14 [46.10, 64.29] | 52.29 [42.89, 61.77] |
| Metabolic BA acceleration       | 0.55 [-3.86, 4.85]   | -0.37 [-4.41, 3.86]  | 0.46 [-3.87, 4.94]   | 0.32 [-3.93, 4.46]   |
| Liver BA                        | 52.42 [41.08, 63.96] | 49.40 [37.83, 60.43] | 57.61 [46.15, 68.52] | 54.13 [42.31, 64.32] |
| Liver BA acceleration           | 0.15 [-8.16, 8.46]   | -0.88 [-8.50, 6.73]  | 2.88 [-5.31, 11.58]  | 1.11 [-6.02, 9.08]   |

684 BA, biological age; BMI, body mass index; CVD, cardiovascular disease; HLI,  
 685 healthy lifestyle indicator.

686 <sup>1</sup> Data are presented as median (25th, 75th percentile) for continuous variables and  
 687 count (percentage) for categorical variables.

688 <sup>2</sup> Information on each validated BA has been reported. BA acceleration is the  
 689 difference between each BA and CA in the same survey.

690

691 **Table 2 Associations of healthy lifestyle factors and HLI with the BA acceleration**  
 692 **of validated BAs**

| Variables                   | Comprehensive<br>BA acceleration<br>$\beta$ (95%CI) | Cardiopulmonary<br>BA acceleration<br>$\beta$ (95%CI) | Metabolic<br>BA acceleration<br>$\beta$ (95%CI) | Liver<br>BA acceleration<br>$\beta$ (95%CI) |
|-----------------------------|-----------------------------------------------------|-------------------------------------------------------|-------------------------------------------------|---------------------------------------------|
| HLI (range)                 |                                                     |                                                       |                                                 |                                             |
| Per 1-point increase        | -0.11 (-0.19, -0.03)                                | -0.02 (-0.04, -0.01)                                  | -0.12 (-0.22, -0.02)                            | -0.23 (-0.47, 0.00)                         |
| HLI (category)              |                                                     |                                                       |                                                 |                                             |
| To have a healthy lifestyle | -0.19 (-0.34, -0.03)                                | -0.03 (-0.07, 0.00)                                   | -0.16 (-0.36, 0.03)                             | -0.19 (-0.66, 0.27)                         |
| Healthy lifestyle factors   |                                                     |                                                       |                                                 |                                             |
| $\Delta$ Smoking            | -0.13 (-0.47, 0.21)                                 | -0.03 (-0.10, 0.04)                                   | -0.54 (-0.97, -0.11)                            | -0.57 (-1.58, 0.44)                         |
| $\Delta$ Alcohol            | -0.17 (-0.47, 0.13)                                 | -0.02 (-0.09, 0.04)                                   | -0.18 (-0.56, 0.21)                             | -0.59 (-1.50, 0.31)                         |
| $\Delta$ Diet               | -0.15 (-0.29, -0.00)                                | -0.01 (-0.04, 0.02)                                   | -0.18 (-0.36, 0.00)                             | -0.10 (-0.53, 0.33)                         |
| $\Delta$ Exercise           | -0.16 (-0.32, 0.00)                                 | -0.03 (-0.07, 0.00)                                   | -0.09 (-0.30, 0.11)                             | -0.05 (-0.53, 0.44)                         |
| $\Delta$ Sleep              | -0.02 (-0.16, 0.12)                                 | -0.02 (-0.05, 0.01)                                   | 0.01 (-0.17, 0.19)                              | -0.36 (-0.78, 0.06)                         |

693 BA, biological age; HLI, healthy lifestyle indicator.

694  $\Delta$ Smoking, change in smoking status between the baseline and repeated survey;

695  $\Delta$ Alcohol, change in alcohol consumption between the baseline and repeated survey;

696  $\Delta$ Diet, change in dietary quality between the baseline and repeated survey;  $\Delta$ Exercise,

697 change in exercise between the baseline and repeated survey;  $\Delta$ Sleep, change in sleep

698 between the baseline and repeated survey; CI, confidence interval.

699 Estimates were obtained using FEMs treating the BA accelerations as the dependent

700 variables and HLI (as either continuous or as categorized) or five individual lifestyle

701 factors as the independent variables. Models were adjusted for age, occupation,

702 marital status, total energy intake, depression symptoms, anxiety symptoms,

703 menopausal status in women, beverage intake, dietary supplement intake, diabetes,

704 cardiovascular disease, cancer, sex, ethnicity, urbanicity, education, and the

705 participants' age at baseline.

706 **Figure legends**

707 **Figure 1. Changes in lifestyle factors from baseline to repeated survey**

708 HLI, healthy lifestyle indicator.

709 The blue bars represent the percentage of individuals who have transitioned to  
710 healthier behaviors or improved their HLI score; the gray bars represent the  
711 percentage of individuals whose behaviors or HLI score have not changed; the orange  
712 bars represent the percentage of individuals who have transitioned to unhealthier  
713 behaviors or whose HLI score has decreased.

714 **Figure 2 Relative contributions of five healthy lifestyle components to BAs**  
715 **acceleration**

716 Panels: Results of the comprehensive BA acceleration, the cardiopulmonary BA  
717 acceleration, the metabolic BA acceleration, and the liver BA acceleration (A–D).

718  $\Delta$ Smoking, change in smoking status between the baseline and repeated survey;

719  $\Delta$ Alcohol, change in alcohol consumption between the baseline and repeated survey;

720  $\Delta$ Diet, change in dietary quality between the baseline and repeated survey;  $\Delta$ Exercise,

721 change in exercise between the baseline and repeated survey;  $\Delta$ Sleep, change in sleep

722 between the baseline and repeated survey.

723 Estimates were obtained using QGC, which treated the BA accelerations as the  
724 dependent variables and five individual lifestyle factors as the independent variables.

725 Models were adjusted for age, occupation, marital status, total energy intake,

726 depression symptoms, anxiety symptoms, menopausal status in women, beverage

727 intake, dietary supplement intake, diabetes, cardiovascular disease, cancer, sex,

728 ethnicity, urbanicity, education, and the participants' age at baseline.

729 The blue bars represent results that are statistically significant in the FEM analysis,  
730 while the gray bars represent results in the FEM analysis that were not found to be  
731 statistically significant.

732 **Figure 3 Stratified analysis of estimated associations between the HLI and the**  
733 **comprehensive BA acceleration**

734 All models were adjusted for age, occupation, marital status, total energy intake,  
735 depression symptoms, anxiety symptoms, menopausal status in women, beverage  
736 intake, dietary supplement intake, diabetes, cardiovascular disease, cancer, sex,  
737 ethnicity, urbanicity, education, and the participants' age at baseline, with exclusion of  
738 the stratified variable as appropriate. The boxes represent point estimations.  
739 Horizontal lines represent 95% CI.

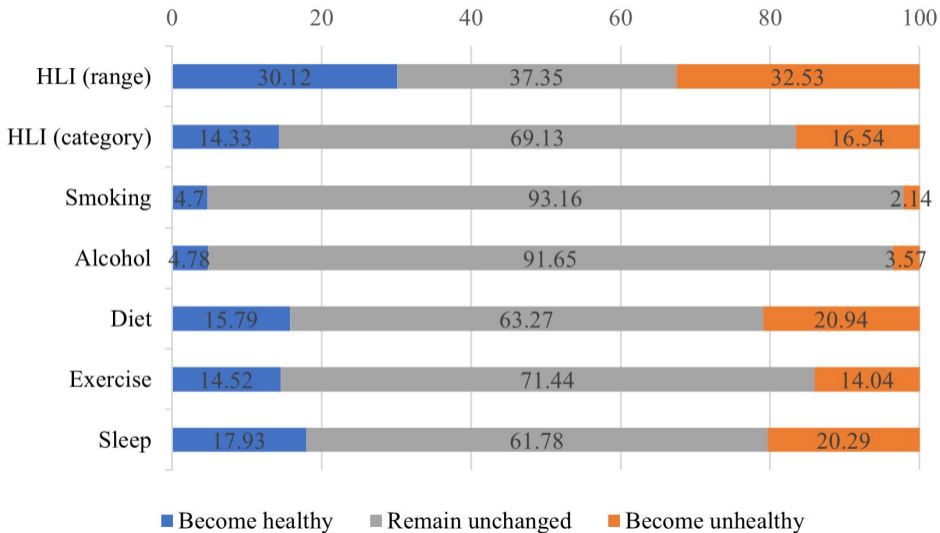

**a Comprehensive BA**

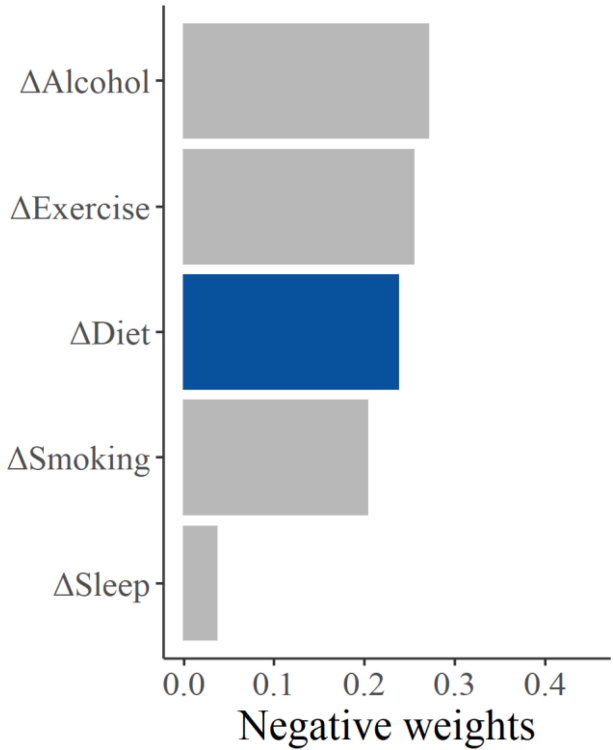

**b Cardiopulmonary BA**

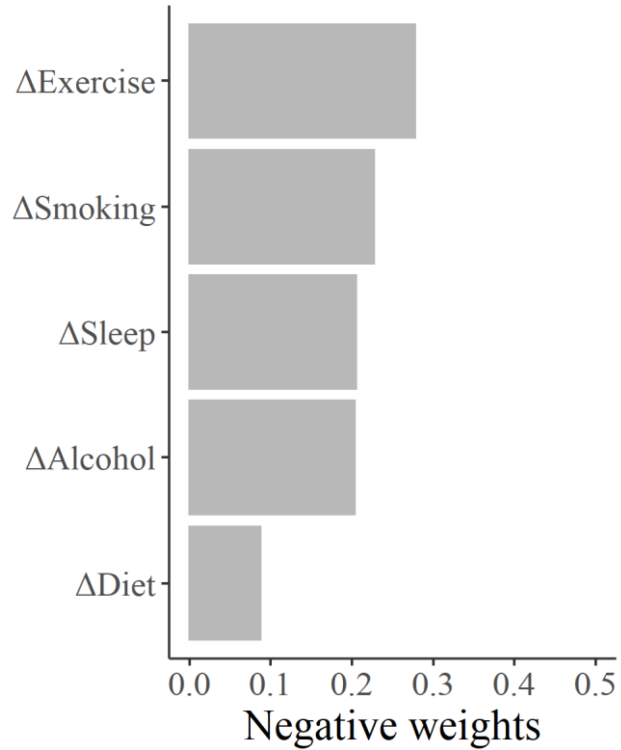

**c Metabolic BA**

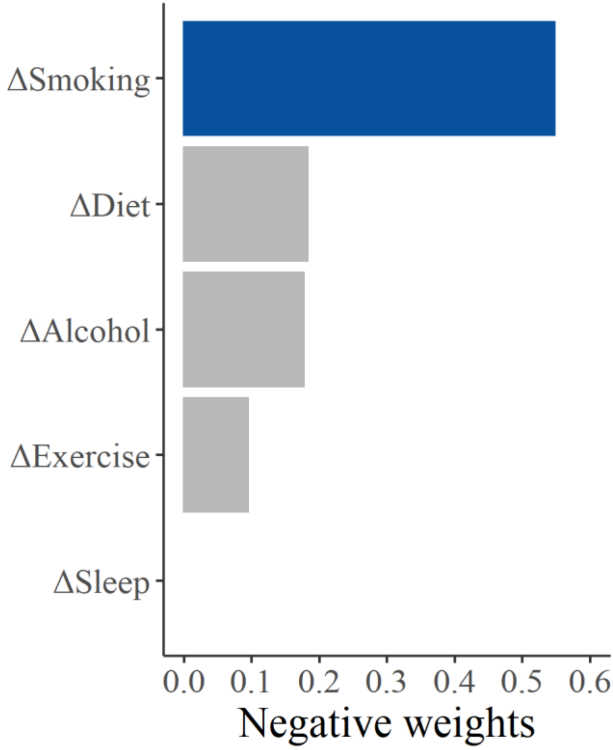

**d Liver BA**

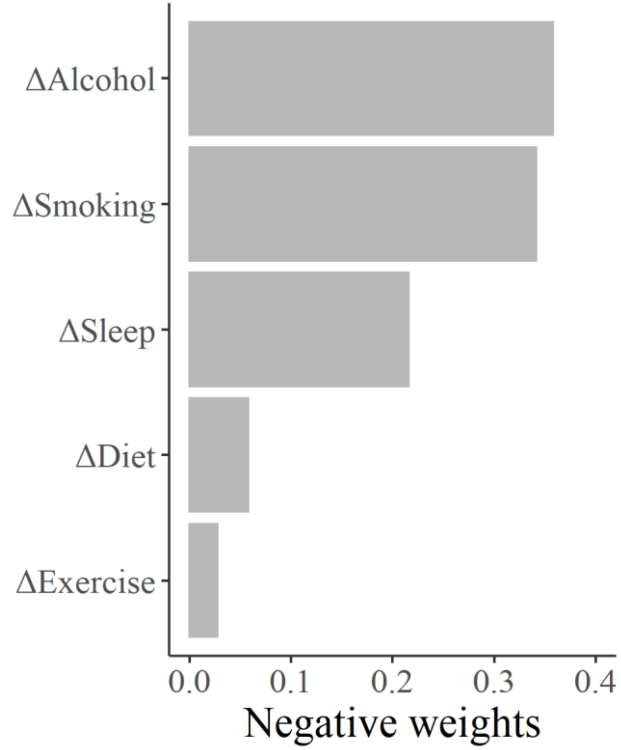

**group**  
Healthy (blue square)  
Non-significant (grey square)



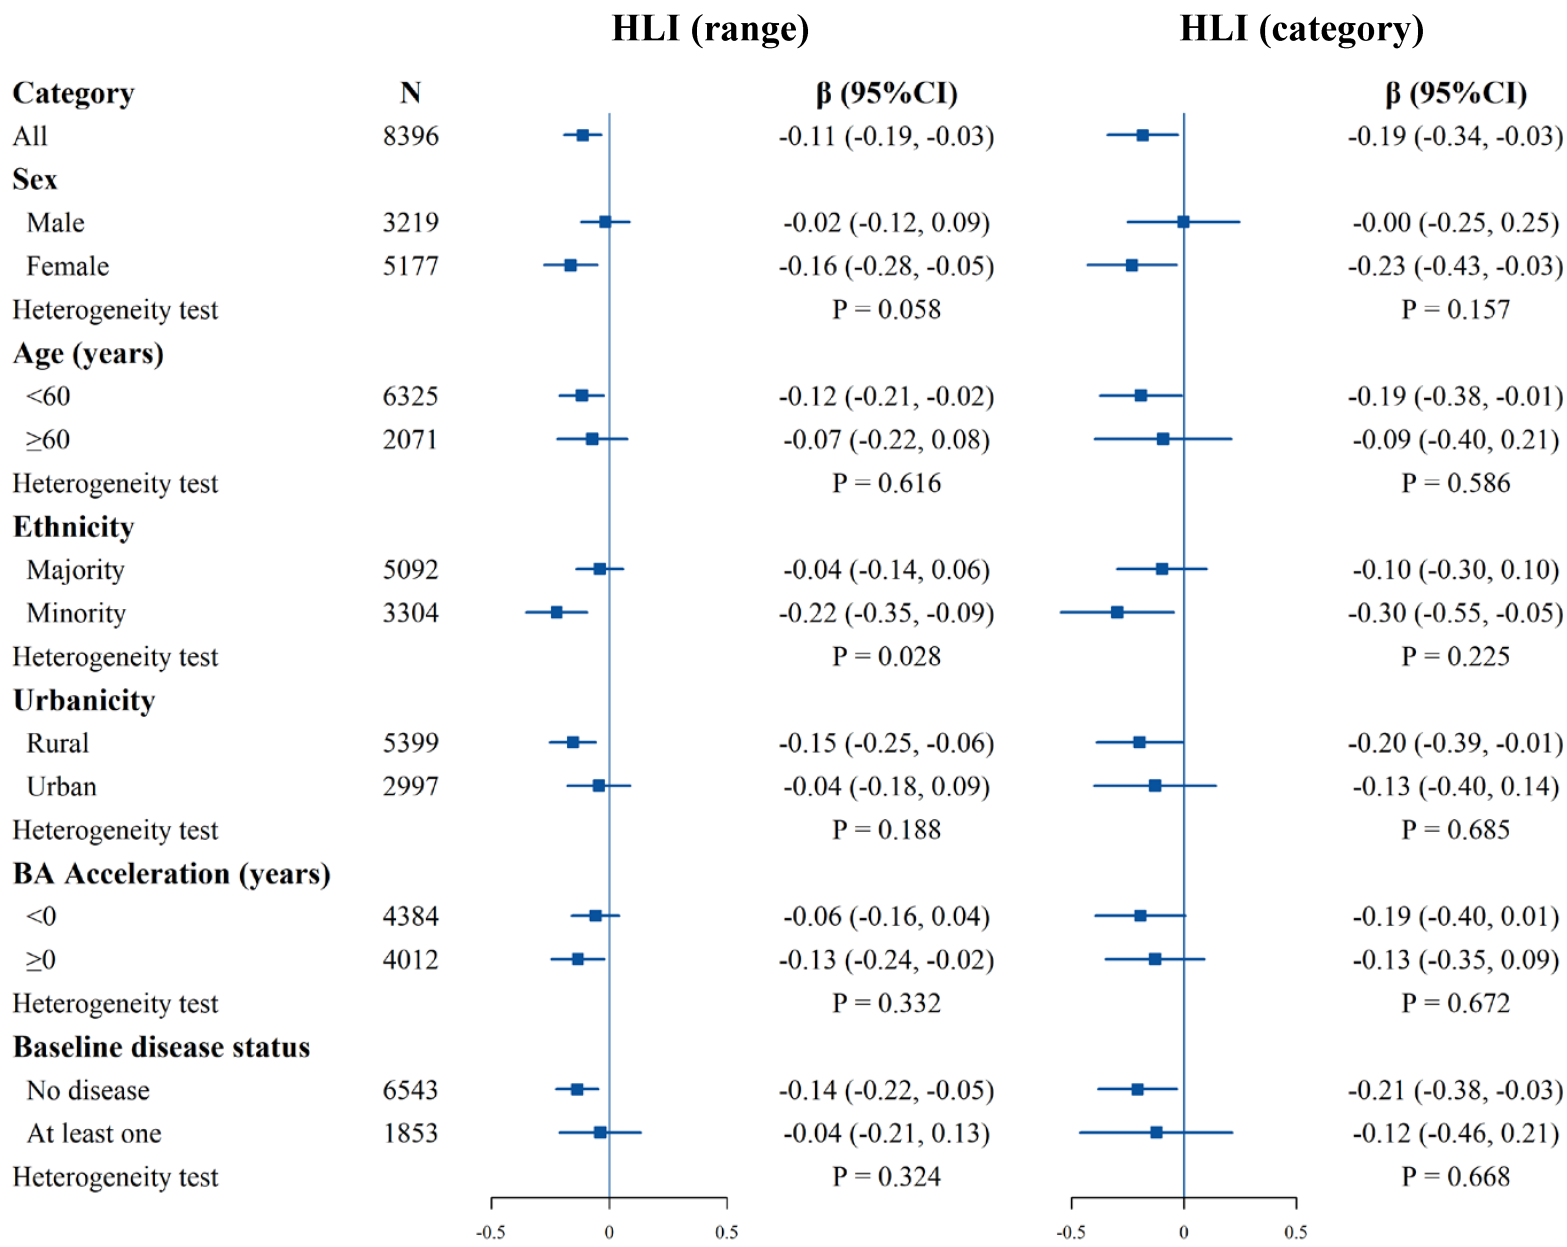

Source: https://medrxiv.org/content/10.1101/2024.06.03.24308368v1.full.pdf
