1 **Title Page**

2 **Full title:** Lifestyles and their relative contribution to biological aging across multiple  
3 organ systems: change analysis from the China Multi-Ethnic Cohort Study

4 Yuan Zhang<sup>1,#</sup>, Dan Tang<sup>2,1,#</sup>, Ning Zhang<sup>1</sup>, Yi Xiang<sup>1</sup>, Yifan Hu<sup>1</sup>, Wen Qian<sup>3</sup>, Yangji  
5 Baima<sup>4</sup>, Xianbin Ding<sup>5</sup>, Ziyun Wang<sup>6</sup>, Jianzhong Yin<sup>7,\*</sup>, Xiong Xiao<sup>1,\*</sup>, Xing Zhao<sup>1</sup>

6 **Affiliations:**

7 <sup>1</sup> West China School of Public Health and West China Fourth Hospital, Sichuan  
8 University, Chengdu, China;

9 <sup>2</sup> Xiamen Center for Disease Control and Prevention, Xiamen, China

10 <sup>3</sup> Chengdu Center for Disease Control and Prevention, Chengdu, China;

11 <sup>4</sup> School of Medicine, Tibet University, Lhasa, China;

12 <sup>5</sup> Chongqing Municipal Centre for Disease Control and Prevention, Chongqing, China;

13 <sup>6</sup> School of Public Health, the Key Laboratory of Environmental Pollution Monitoring  
14 and Disease Control, Ministry of Education, Guizhou Medical University, Guiyang,  
15 China;

16 <sup>7</sup> School of Public Health, Kunming Medical University, Kunming, China;

17 <sup>#</sup> Joint first authors, these authors contributed equally to this work;

18 <sup>\*</sup> Co-corresponding author: Jianzhong Yin, E-mail: yinjianzhong2005@sina.com,  
19 Address: No. 1168, Chunrong West Road, Yuhua Street, Chenggong District,  
20 Kunming, Yunnan, 650500, China; Xiong Xiao, E-mail: xiaoxiong.scu@scu.edu.cn,  
21 Address: No.16, People's South Road, Chengdu, Sichuan, 610041, China.

22 **Funding**

23           This work was primarily supported by the National Natural Science Foundation  
24 of China (Grant No. 82273740) and Sichuan Science and Technology Program  
25 (Natural Science Foundation of Sichuan Province, Grant No. 2024NSFSC0552). The  
26 CMEC study was funded by the National Key Research and Development Program of  
27 China (Grant No. 2017YFC0907305, 2017YFC0907300). The sponsors had no role in  
28 the design, analysis, interpretation, or writing of this article.

29   **Ethics approval and consent to participate**

30           This study was approved by the Sichuan University Medical Ethical Review  
31 Board [ID: K2016038, K2020022]. All procedures in the study were consistent with  
32 the 1964 Declaration of Helsinki and its subsequent amendments. All subjects  
33 agreeing to take part in the study signed informed written consent.

34

35 **Abstract**

36 **Background**

37 Biological aging exhibits heterogeneity across multi organ systems. However, it  
38 remains unclear how is lifestyle associated with overall and organ-specific aging and  
39 which factors contribute most in Southwest China.

40 **Objective**

41 To examine the associations of healthy lifestyle with comprehensive and organ-  
42 specific biological ages and which lifestyle factors contribute most.

43 **Methods**

44 This study involved 8,396 participants who completed two surveys from the China  
45 Multi-Ethnic Cohort (CMEC) Study. The healthy lifestyle index (HLI) was developed  
46 using five lifestyle factors: smoking, alcohol, diet, exercise, and sleep. The  
47 comprehensive and organ-specific biological ages (BAs) were calculated using the  
48 Klemmera-Doubal method based on longitudinal clinical laboratory measurements, and  
49 validation were conducted to select BA reflecting related diseases. Fixed effects  
50 model was used to examine associations between HLI or its components and the  
51 acceleration of validated BAs. We further evaluated the relative contribution of  
52 lifestyle components to comprehension and organ systems BAs using quantile G-  
53 computation.

54 **Results**

55 About two-thirds of participants changed HLI scores between surveys. After  
56 validation, three organ-specific BAs (the cardiopulmonary, metabolic, and liver BAs)

57 were identified as reflective of specific diseases and included in further analyses with  
58 the comprehensive BA. The health alterations in healthy lifestyle index showed a  
59 protective association with the acceleration of all biological ages, with a mean shift of  
60 -0.19 (95%CI: -0.34, -0.03) in the comprehensive biological age acceleration. Diet  
61 and smoking were the major contributors to overall negative associations of five  
62 lifestyle factors with the comprehensive BA and metabolic BA accounting for 24%  
63 and 55% respectively.

#### 64 **Conclusions**

65 Healthy lifestyle changes were inversely related to comprehensive and organ-specific  
66 biological aging in Southwest China, with diet and smoking contributing most to  
67 comprehensive and metabolic BA separately. Our findings highlight the potential of  
68 lifestyle interventions to decelerate aging and identify intervention targets to limit  
69 organ-specific aging in less-developed regions.

70 **Keywords:** healthy lifestyle; biological aging; organ-specific aging; change analysis;  
71 Kleméra-Doubal method of biological age.

72

## 73 **Introduction**

74 Aging is a global issue, with about 10 percent of the world population aged 65 years  
75 and over in 2022, and the proportion expected to be near 16 percent by 2050(1). In  
76 China, the proportion has reached 14.2% at the end of 2021(2). Aging leads to  
77 reduced life expectancy and chronic diseases through dynamic and heterogeneous  
78 changes in biological systems(3). While chronological age (CA) is widely used as a  
79 marker of aging, biological age (BA) has been constructed as a more accurate  
80 indicator for biological aging(4). Aging exhibits variations across and within  
81 individuals; people with the same CA can age at different rates, and distinct organ  
82 systems within an individual can also age differently(5). Comprehensive aging  
83 indicators like epigenetic clocks and PhenoAge, capturing different aging aspects,  
84 have been developed(6, 7). Recent studies have focused on organ-specific aging  
85 markers to understand their aging rate variations(8, 9). The process of biological  
86 aging, influenced by genetics, environment, and health behaviors, is modifiable, yet  
87 research has predominantly concentrated on comprehensive biological age (10-13).  
88 Nevertheless, current research on determinants of multi-organ biological aging  
89 remains limited. Further investigation is crucial to deepen understanding of  
90 comprehensive and organ-specific biological aging and to develop targeted  
91 interventions for age-related diseases of each organ system.

92 Lifestyle factors such as smoking, drinking, diet, physical activity, and sleep are  
93 recognized as contributors to many age-related diseases(14-16), and researchers have  
94 begun to explore how lifestyle factors influence the process of biological aging.

95 Studies on lifestyle and BA can be summarized into two categories, one focusing on  
96 the association of a single lifestyle factor with biological aging(17-20) because  
97 lifestyle factors may be interrelated and have cumulative effects, the other further  
98 focusing on the impact of a combined lifestyle on biological aging. Research focusing  
99 on healthy lifestyles has been conducted in Chinese(21, 22), American(23), and  
100 British populations(24) and has found that adherence to a healthy lifestyle is  
101 consistently associated with slower biological aging. However, most studies used one-  
102 time measurements of lifestyle factors as exposure and could not examine the impact  
103 of lifestyle changes on BA. In addition, research has often focused on epigenetic age  
104 and PhenoAge. The Klemera-Doubal method of biological age (KDM-BA) has been  
105 shown to perform well in predicting frailty and mortality and is used to identify the  
106 biological ages of organ systems(8, 25). Therefore, KDM-BA, based on clinical-lab  
107 data sets, offers accessible and cost-effective means for aging identification and  
108 intervention. Besides, no study has been conducted to analyze further the relative  
109 contributions of multiple lifestyle changes on various organ systems BA, which could  
110 identify important influences on the comprehensive and organ-specific biological  
111 aging to prioritize interventions, especially in developing regions with limited  
112 resources. Southwest China is characterized by multi-ethnicity, unbalanced internal  
113 development, and rapid aging, making identifying priority intervenable aging factors  
114 important.

115 Therefore, based on the China Multi-Ethnic Cohort Study (CMEC), this study  
116 aimed to develop potential BAs for organ systems using the KDM algorithm, explore

117 how lifestyle changes correlate with both comprehensive and organ-specific BAs, and  
118 further investigate the relative contributions of individual lifestyle components in  
119 southwest China.

## 120 **Methods**

### 121 **Study Population**

122 This study used data from the CMEC baseline and repeated surveys for analysis. The  
123 CMEC adopted a multi-stage stratified cluster sampling, with participants covering  
124 five provinces and seven ethnic groups (Tibetan, Yi, Miao, Bai, Bouyei, Dong, and  
125 Han) in Southwest China, representing the local regional and ethnic characteristics.  
126 The baseline survey of the CMEC was conducted between May 2018 and September  
127 2019, and the repeated survey was conducted between August 2020 and June 2021.  
128 The CMEC baseline survey included 99,556 individuals, with 10% of the sample  
129 population selected for the repeated survey. Details of the CMEC procedures and  
130 methodology have been described in our previous study(26). Participants' personal  
131 interviews, physical examinations, and clinical laboratory measurements were  
132 completed using a uniform standardized operating procedure in both surveys. The  
133 study protocol was approved by the Sichuan University Medical Ethical Review  
134 Board [ID: K2016038, K2020022]. All participants in the study signed an informed  
135 consent form before the investigation.

136 In this study, we included participants with available information on lifestyle,  
137 measurements for calculating BA required, and covariates. We excluded individuals  
138 with missing data to calculate BA and individuals with incomplete data on lifestyle

139 and covariates for participants at the baseline and repeated survey. Finally, 8396  
140 individuals aged 30-79 were included as the full set in the longitudinal analysis after  
141 matching (Supplementary Figure 1).

#### 142 **Definition of lifestyle factors**

143 Considering previous studies(15, 27), the healthy lifestyle index (HLI) was  
144 established through five lifestyle factors: smoking, alcohol consumption, diet,  
145 exercise, and sleep. Data for the lifestyle factors were obtained from the questionnaire,  
146 and the simplified semi-quantitative food frequency questionnaire (FFQ) was assessed  
147 by trained staff. The FFQ's reproducibility and validity were evaluated by conducting  
148 repeated FFQs and 24-hour dietary recalls(28).

149 The definitions of a healthy lifestyle are as follows. Smoking was categorized  
150 according to smoking status, and never smoking was defined as healthy. For alcohol  
151 consumption, according to the findings of recent research on alcohol consumption in  
152 Chinese populations, being healthy was defined as being a non-regular drinker  
153 (drinking frequency less than once a week)(29). For diet, since the Mediterranean diet  
154 (MED) is currently the most internationally recognized healthy dietary pattern and has  
155 widely and robustly beneficial effects(30), we used the alternative Mediterranean diet  
156 (aMED) to evaluate dietary quality, with details shown in the supplemental material.  
157 Since the HLI already contained a drinking component, we removed the drinking item  
158 in the aMED, which had a score range of 7-35. We defined individuals with aMED  
159 scores  $\geq$  population median as healthy diets. More details on the calculation of aMED  
160 can be found in previous studies(28). For exercise, based on how often participants



161 participated in physical activity in their leisure time during the past year, regular  
162 exercise (“1–2 times/week”, “3–5 times/week,” or “daily or almost every day”) was  
163 categorized as healthy(31). For sleep, a sleep duration of 7-8 hours was defined as  
164 healthy sleep based on previous studies(32).

165 In addition, to comprehensively evaluate the impact of overall healthy lifestyle  
166 level on outcomes, we further constructed the HLI in this study. For each lifestyle, we  
167 assign 1 point to health and 0 points to the opposite. The HLI was calculated by  
168 directly adding up the five lifestyle scores, ranging from 0-5, with a higher score  
169 representing an overall healthier lifestyle, denoted as HLI (range) in the following text.  
170 We then transformed HLI into a dichotomous variable in this study, denoted as HLI  
171 (category), where a score of 4-5 for HLI was considered a healthy lifestyle, and a  
172 score of 0-3 was considered an unfavorable lifestyle that could be improved.

### 173 **Covariate Assessment**

174 The selection of covariates is based on prior literature review and previously  
175 constructed directed acyclic graphs (Supplementary Figure 2). Covariates included  
176 age, sex, ethnicity (majority, minority), urbanicity (rural, urban), education (No  
177 schooling, primary school, Middle/high school, College/university), occupation  
178 (primary industry practitioner, secondary industry practitioner, tertiary industry  
179 practitioner, unemployed), marital status (married/cohabiting, not  
180 married/cohabitating), total energy intake (kcal/day), depression symptoms, anxiety  
181 symptoms, menopausal status in women (premenopausal, perimenopausal,  
182 postmenopausal), beverage intake (never, former consumer, currently consuming),

183 dietary supplement intake, self-reported doctor-diagnosed diseases of diabetes,  
184 cardiovascular disease (CVD), and cancer. Among these, sex, ethnicity, urbanicity,  
185 and education were considered time-invariant variables, while other variables were  
186 considered time-varying.

### 187 **BA Construction**

188 The comprehensive BA and BAs across multiple organ systems were estimated using  
189 the Klemra-Doubal method(33), which is well-validated in the Chinese  
190 population(34). We selected indicators for constructing BA from clinical-lab data sets  
191 measured in the baseline and repeated surveys of the CMEC, filtering based on a  
192 missing rate of less than 30%. Based on previous studies, these indicators were  
193 categorized into five systems based on the organ/system function they represent:  
194 cardiopulmonary, metabolic, liver, renal, and immune systems, as detailed in the  
195 Supplementary Table 2(8, 9). Thus, we developed a comprehensive BA alongside five  
196 organ system-specific BAs: cardiopulmonary BA, metabolic BA, liver BA, renal BA,  
197 and immune BA. The selection process was then completed following the  
198 methodology used in our previous studies, which are detailed in the supplementary  
199 materials.

200 After finishing the screening process, 15 measures were used in constructing the  
201 comprehensive BA, which were systolic blood pressure (SBP), waist-to-hip ratio  
202 (WHR), peak expiratory flow (PEF),  $\gamma$ -Glutamyl transpeptidase (GGT), albumin  
203 (ALB), low-density lipoprotein cholesterol (LDL-CH), high-density lipoprotein  
204 cholesterol (HDL-CH), triglyceride (TG), aspartate aminotransferase (AST),

205 creatinine (Cr), alkaline phosphatase (ALP), urea, mean corpuscular volume (MCV),  
206 glycosylated hemoglobin (HBA1C) and platelet count (PLT). The cardiopulmonary  
207 BA was assessed using SBP and PEF; the metabolic BA was assessed using LDL-CH,  
208 HDL-CH, HBA1C, TG and WHR; the liver BA was assessed using AST, GGT, ALP,  
209 ALB; the renal BA was assessed using Cr and urea, and the immune BA was assessed  
210 using PLT and MCV. Using the above measures, we calculated each BA in the male  
211 and female populations separately using the KDM algorithm. To quantify variation in  
212 biological aging between participants, we calculated BA acceleration, which is the  
213 difference between each BA and CA simultaneously.

#### 214 **BA Validation**

215 To assess the performance of the newly developed BAs of multiple organ systems, we  
216 performed a validation analysis to evaluate the relationships between them and organ-  
217 specific diseases. Given the short follow-up period in the CMEC study, we conducted  
218 a cross-sectional analysis using baseline data. We separately examined the  
219 associations between the comprehension BA and CVD, diabetes, cancer,  
220 cardiopulmonary BA and CVD and chronic bronchitis, the metabolic BA and CVD  
221 and diabetes, the liver BA and chronic hepatitis or cirrhosis, the immune BA and  
222 rheumatoid arthritis. For interpretability, we simultaneously standardized and  
223 classified each BA acceleration into categories ( $|\text{BA acceleration}| \leq 1$ , BA acceleration  
224  $< -1$ , and BA acceleration  $> 1$ ). We used logistic regression to assess the associations  
225 between each continuous and categorized BA ( $|\text{BA acceleration}| \leq 1$  serving as the  
226 reference group) and the diseases. Since the values of BA acceleration of the

227 cardiopulmonary BA were small, it was not processed as categorical variables. The  
228 model was additionally adjusted for five healthy lifestyle factors based on the  
229 covariates. The comprehensive BA constructed in the CMEC study has been validated  
230 to better reflect age-related disease and frailty(35). After completing the validation  
231 analysis, we selected BAs reflecting aging and related diseases for further analysis.

### 232 **Statistical analysis**

233 We described changes in lifestyle between the two waves of surveys, where changes  
234 were categorized as becoming healthier, remaining unchanged, and becoming  
235 unhealthier. For single lifestyles, remaining unchanged indicates that the factor has  
236 remained healthy or unhealthy at two surveys; becoming healthier suggests that it was  
237 unhealthy at baseline and became healthy on the repeated survey, and vice versa. For  
238 the HLI scores, no change indicates the same score in both surveys, a change to  
239 healthier implies a repeated survey score higher than the baseline score, and a shift in  
240 less healthy indicates a repeated survey score lower than the baseline score. The  
241 dichotomous HLI's change categorization was similar to the single lifestyle. The  
242 baseline characteristics of participants were described across categories in the  
243 dichotomized HLI, with continuous variables represented by median (Interquartile  
244 range, IQR) and categorical variables by proportions (Table 1).

245 We used the fixed effects model (FEM) to examine associations between each  
246 lifestyle factor and the acceleration of validated BAs for people who participated in  
247 both surveys. FEM is extensively applied in the analysis of panel data in the fields of  
248 sociology, economics, and public health research, where it serves to control for

249 unobserved individual heterogeneity. The detailed methodology of the FEM is  
250 outlined in the supplementary materials. Because of the approximately 2-year interval  
251 between the two CMEC waves, we assumed that the short-term effect of lifestyle  
252 changes on biological aging was linear during this period. Multivariable-adjusted  
253 models were constructed to account for potential confounding, including time-varying  
254 and time-invariant variables and baseline CA. We incorporated five lifestyle factors as  
255 exposures simultaneously into the model, while the continuous and binary HLI were  
256 entered into the model as exposures separately. Since the BAs we analyzed may  
257 potentially measure overlapping aspects of human aging, we did not correct for  
258 multiple comparisons (Supplementary Figure 3).

259 To further obtain the relative contribution of each lifestyle factor on validated  
260 comprehension and organ systems BA, the present study used data from two waves  
261 for quantile G-computation (QGC) analysis. QGC is a statistical technique for  
262 evaluating the effects of mixture exposures, capable of discerning positive and  
263 negative influences, and is widely used in environmental epidemiology research(36,  
264 37). Additionally, subgroup analyses for continuous and categorized HLI and each  
265 validated BA were conducted across sex (male vs. female), baseline age (<60 vs. ≥60),  
266 ethnicity (majority vs. minority), urbanicity (rural vs. urban), baseline BA acceleration  
267 (<0 vs. ≥0), and baseline disease status (free of diabetes, CVD, and cancer vs. either  
268 one). The heterogeneity between strata was assessed using the Q test ( $\alpha = 0.1$  was  
269 considered significant heterogeneity).

270 We performed sensitivity analyses concerning exposure definitions, confounders,

271 and our analysis method. First, we repeated the analysis of the association between  
272 lifestyles and BAs using a standard FEM, with adjustments made only for time-  
273 varying variables. Second, we used alternative common health criteria for each  
274 lifestyle factor separately, and we repeated the FEM analyses and QGC analyses by  
275 replacing the health definition of one lifestyle factor at a time. Exposure definitions  
276 for the main analyses and sensitivity analyses are shown in the Supplementary Table 1.  
277 Third, we did not adjust for body mass index (BMI) in models because some studies  
278 have suggested that BMI may be an intermediate factor between lifestyles and health  
279 outcomes. However, in the sensitivity analysis, we additionally adjusted for BMI in  
280 the FEM and QGC analyses models. Statistical analyses were performed using R  
281 Project for Statistical Computing version 4.1.1 (Vienna, Austria).

## 282 **Results**

### 283 **Lifestyle changes between two waves in CMEC**

284 Figure 1 shows the changes in lifestyle factors in the study population from baseline  
285 to repeated surveys. For the HLI (range), more than 60 percent of participants  
286 experienced a lifestyle change. For the HLI (category), about 30 percent of  
287 participants changed lifestyle categories, and the percentages were close for both  
288 types. For each lifestyle factor, the proportion of individuals who remained unchanged  
289 during the two surveys was higher than that of individuals who changed, with  
290 smoking and drinking having the highest proportion of unchanged individuals at more  
291 than 90 percent, indicating that these two lifestyle factors are less likely to change.  
292 Sleep and diet behaviors had a relatively high percentage of change, accounting for

293 over one-third, and exercise had a slightly lower rate of change, nearly 30 percent.

#### 294 **Construction and validation of organ systems BAs**

295 Details of the comprehensive and organ systems BAs are presented in Supplementary  
296 Table 3. The results of the cross-sectional analysis between the comprehensive and  
297 organ systems BAs and diseases are presented in Supplementary Table 4. Accelerated  
298 comprehensive BA was positively correlated with an increased risk of CVD and  
299 diabetes. The cardiopulmonary BA, the liver BA, and the metabolic BA were each  
300 linked to an increased risk of their respective diseases. An increase in  
301 cardiopulmonary BA acceleration was associated with a higher risk of cardiovascular  
302 diseases but not with chronic obstructive pulmonary disease. Per 1-SD increase of the  
303 liver BA was associated with a higher risk of chronic hepatitis or cirrhosis (OR 1.28,  
304 95% *CI* 1.23-1.33), and per 1-SD increase in metabolic BA corresponded to a higher  
305 risk of CVD (OR 1.21, 95% *CI* 1.19-1.23) and diabetes (OR 3.23, 95% *CI* 3.12-3.34).  
306 However, no expected associations with related diseases were observed for immune  
307 BA. Finally, we concluded that the cardiopulmonary BA, the metabolic BA, and the  
308 liver BA could reflect organ-specific disease and were included in subsequent  
309 analyses along with comprehensive BA.

#### 310 **Characteristics of participants by HLI categories**

311 Table 1 reports the characteristics of populations categorized by dichotomous HLI at  
312 baseline and the repeated survey. In this study, 3461 individuals had a healthy lifestyle,  
313 and individuals with an unfavorable lifestyle accounted for a higher proportion (n (%)  
314 = 4935 (58.8%)) at baseline. There was a slight decrease in the proportion of people

315 with a healthy lifestyle at the time of the repeated survey (n (%) = 3275 (39.0%)),  
316 while 5049 (61.0%) had an unfavorable lifestyle.

317 Since the lifestyle categories of participants may change, the distribution of  
318 population characteristics between baseline and repeated surveys changes slightly but  
319 is generally similar. Participants with healthy lifestyles were more likely to be female,  
320 in urban areas, Han Chinese, with higher levels of education, less likely to be  
321 employed in primary and secondary industries, more likely to be premenopausal and  
322 with dietary supplement intake, less likely to have anxiety, depression, and younger in  
323 biological age, as shown by the lower median of BA and BA acceleration of the  
324 comprehensive, cardiopulmonary, metabolic and liver BA. For major diseases, the  
325 proportion of people with a healthier lifestyle was closer to that of people with an  
326 unfavorable lifestyle in both surveys.

327 **Associations of lifestyle factors and HLI changes with BAs acceleration and**  
328 **relative contributions**

329 Table 2 shows the associations of individual lifestyle factors and continuous and  
330 dichotomous HLI with all validated BAs acceleration. For comprehensive BA, a  
331 significant negative association was found between HLI and accelerated biological  
332 aging, with a mean change of -0.19 (95% CI: -0.34, -0.03) in the BA acceleration for a  
333 healthier lifestyle change. Results showed that a change of -0.15 (95% CI: -0.29, -  
334 0.00) in the comprehensive BA acceleration was associated with a shift in diet. For the  
335 cardiopulmonary BA, metabolic BA, and liver BA, the HLI was associated with a  
336 reduction in each BA acceleration, although some of the results were not statistically



337 significant. Shift in smoking was related to a change in metabolic BA acceleration of -  
338 0.54 (95% *CI*: -0.97, -0.11), and the results of individual lifestyle factors and the  
339 cardiopulmonary BA as well as the liver BA did not reach statistical significance.

340 The relative contribution of each lifestyle factor on the comprehensive and the  
341 cardiopulmonary BA, the metabolic BA, and the liver BA acceleration based on the  
342 QGC method are shown in Figure 2. For comprehensive BA, the relative contribution  
343 of diet was 0.24. Although the relative contributions of drinking and exercise were  
344 slightly higher than that of diet, they were not statistically significant. For metabolic  
345 BA, smoking was the major contributor, weighting 0.55. For cardiopulmonary BA and  
346 liver BA, exercise and alcohol consumption were the most contributing components  
347 in all lifestyle factors separately, although the results were statistically significant.

#### 348 **Results of subgroup analysis and sensitivity analysis**

349 Figure 3 shows the results of the subgroup analyses of the HLI range and category  
350 with the comprehensive BA acceleration. For the HLI range, the direction of the  
351 association was consistent with the whole population, with statistical significance  
352 only in females, the younger, minorities, rural residents, accelerated BA group, and no  
353 baseline disease populations. The negative association was stronger in minorities  
354 (Heterogeneity test  $P = 0.028$ ). For categorized HLI and AA, the direction of the  
355 association was broadly consistent with the whole population. The continued HLI  
356 results for cardiopulmonary BA showed a stronger negative association in females  
357 (Heterogeneity test  $P = 0.045$ , Supplementary Figure 4). For metabolic BA and liver  
358 BA, no differences were observed between different subgroups (Supplementary

359 Figure 5 and 6).

360 We conducted a series of sensitivity analyses to test the robustness of the results.  
361 Firstly, the results of the standard FEM analysis were broadly consistent with the  
362 primary analysis (Supplementary Table 5 and Supplementary Figure 7). For the  
363 comprehensive BA, exercise along with diet was negatively correlated with BA  
364 acceleration, and in the main analysis, exercise was borderline statistically significant.  
365 While the results of some lifestyles for liver function BA changed, none were  
366 statistically significant. Secondly, changing the definition of health for any lifestyle  
367 factor had negative association estimates with all BAs acceleration for the HLI.  
368 Although the effect size of some lifestyle factors changed, most of the results  
369 remained stable. Full results are reported in Supplementary Table 6 and  
370 Supplementary Figure 8-11. Thirdly, with additional adjustment for BMI, the  
371 direction and magnitude of the associations were generally consistent with the main  
372 analysis results (Supplementary Table 7 and Supplementary Figure 12). In summary,  
373 the sensitivity analysis results aligned with the main results and were relatively robust.

#### 374 **Discussion**

375 This study examined the association of lifestyle changes on biological aging in the  
376 Southwest Cohort based on two surveys. About two-thirds of the participants were  
377 observed to change their HLI scores between the two surveys. The health alterations  
378 in HLI showed a protective association between accelerated aging of comprehension  
379 and each organ system. The relative contribution of diet was the largest among all  
380 lifestyle components for the comprehensive BA, and smoking contributed the most to

381 the metabolic BA, respectively, suggesting that these factors are particularly crucial in  
382 specifically decelerating the pace of biological aging.

383 In our study, the prevalence of healthy lifestyles was higher than the prevalence  
384 reported by research based on the China Kadoorie Biobank study and the China  
385 Nutrition and Health Surveillance (38), with those with 4-5 lifestyle factors  
386 accounting for 41.2% and 39.0% at baseline and repeated surveys, respectively. The  
387 relatively high prevalence of healthy lifestyles in this study may be explained by he  
388 recent establishment of the CMEC and an overall trend towards healthier lifestyles,  
389 alongside different lifestyle standards. Furthermore, we noted lifestyle changes in our  
390 research and subsequently employed the FEM for analysis based on this observation.  
391 Lifestyle may be influenced by environmental factors such as urbanization and  
392 individual characteristics such as health awareness, and thus, lifestyle may change  
393 over time, yet fewer studies have focused on this(39). The high proportion of changes  
394 occurring in sleep, exercise, and diet here suggests that they may be more variable and  
395 relatively easy to intervene. For overall health styles, there was a higher proportion of  
396 changes in lifestyle scores but fewer shifts from unhealthy to healthy or healthy to  
397 unhealthy. That is, while lifestyle fluctuates over time, it is less likely to change  
398 substantially, consistent with the findings of another study(14, 40).

399 Our study reveals that healthy lifestyle shifts can slow the pace of comprehensive  
400 BA, with diet being a crucial component. Both the HLI range and category showed  
401 robust protective associations. Although there are differences in lifestyle definitions  
402 and aging indicators, available studies consistently find that healthier lifestyles are

403 associated with lower aging acceleration(21, 23, 41, 42). Despite limited research on  
404 how lifestyle components contribute to aging, our study provides additional evidence.  
405 We used the widely recommended aMED as a healthy dietary criterion, which  
406 includes rich plant foods, olive oil, moderate fish, and red wine, some of which may  
407 slow aging and promote health(43). In our study, the association between exercise and  
408 comprehensive BA was nearly statistically significant. Higher levels of exercise have  
409 been shown to be associated with a lower incidence of chronic disease and a longer  
410 lifespan(44, 45). Diet and exercise may slow aging through beneficial DNA  
411 methylation changes(46), modification of gut microbiota(47), and reducing oxidative  
412 stress and inflammation(48, 49), collectively enhancing fitness and slowing the aging  
413 pace. Combining the previous randomized controlled trial with our findings, the  
414 evidence suggested that diet and exercise are easily modifiable anti-aging factors in  
415 the real world(13).

416 Another contribution of our study is presenting evidence of different lifestyle  
417 factors influencing multi-organ BA, which was constructed and validated for  
418 Southwest China. The HLI still played a protective role against aging across various  
419 organ systems, yet the components contributing most varied specifically. Biological  
420 aging varies across organ systems, and the associations with lifestyle may differ.  
421 Change in smoking played a significant role in metabolic aging. The current study of  
422 the British population has also identified smoking as a factor influencing aging across  
423 multiple organ systems(9). The Coronary Artery Risk Development in Young Adults  
424 Study revealed that smoking contributed to epigenetic aging acceleration by

425 83.5%(41). The variation in results could be attributed to the fact that current studies  
426 offer evidence of cumulative exposure to smoking(17, 21), while our research focuses  
427 on short-term changes. Short-term smoking behavior changes may be sufficient to  
428 impact metabolism aging but do not significantly affect the comprehensive BA.  
429 Existing research has shown that the metabolic and immune systems can impact  
430 various systems through inter-organ aging pathways, making it essential to focus on  
431 modifiable factors of metabolic system aging. Hence, we discovered that smoking  
432 could serve as an intervention target for organ system aging, holding the potential to  
433 delay the onset of diseases in specific systems, thereby extending a healthy lifespan.

434 In subgroup analysis, we discovered that negative associations of HLI and the  
435 comprehensive BA acceleration varied among ethnic groups. No observed differences  
436 in HLI category change between ethnic groups, potentially due to insufficient  
437 statistical power. Compared to the majority group, the minority may have lower  
438 socioeconomic status and less health awareness, leading to less management of  
439 lifestyle factors and, consequently, stronger associations when changes in these  
440 factors occur. Given that biological aging is a cause of various long-term outcomes,  
441 these results highlight the importance of conducting interventions among minority  
442 groups in Southwest China.

#### 443 **Strengths and limitations**

444 Unlike previous studies that used one measurement of lifestyle or biological age, our  
445 study utilized longitudinal data from two waves of the CMEC study, which measured  
446 the longitudinal changes in lifestyle behaviors and BA of the body and multi-organ

447 systems. We also assessed the impact of alterations in healthy lifestyle factors on  
448 validated BAs and further characterized the relative contributions. This  
449 comprehensive approach offers the latest evidence for the early prevention and  
450 targeted behavioral interventions of organ-specific aging and related diseases in  
451 southwestern China.

452 This study has certain limitations. Firstly, our construction of multi-organ BA  
453 was limited by the clinical lab data measures, preventing the development of BAs for  
454 some organ systems like the brain. Additionally, we could not fully capture specific  
455 aging processes of the immune system because of few immune-related indicators and  
456 the possible omission of critical markers. However, we used routinely detected  
457 biomarkers to construct the BA, which are cost-effective and easily implemented.  
458 Therefore, this multi-organ BAs are suitable for broad adoption in primary prevention,  
459 especially in developing areas like Southwestern China. Besides, the CMEC had a  
460 limited range of diseases collected, precluding all BAs validation. Thus, we finally  
461 included only those BAs that could be validated for further analysis. Secondly, as an  
462 observational study, we established a prospective association between healthy  
463 lifestyles and accelerated aging, yet it does not confirm a causal relationship. Thirdly,  
464 the CMEC was established in 2018 with only data from two survey waves, which  
465 highlights the drawback of reduced statistical power of FEM. Future research could  
466 build on long-term, multi-wave follow-ups, employing FEM analysis based on  
467 repeatedly collected data to derive more reliable causal effect estimates. Fourthly,  
468 there is no gold standard for measuring biological aging. However, the KDM-BA

469 method used in this study has the advantage of accurately predicting aging-related  
470 outcomes, and it has been validated in our study population(35). Fifth, assessment of  
471 lifestyle factors was based on self-reported data collected through questionnaires,  
472 which may be subject to recall bias. Lastly, our study is based on a population from  
473 the Southwestern China which could limit the generalizability of our findings.  
474 However, the Southwestern China is characterized by its diverse ethnicities and lower  
475 developmental level, with few studies addressing biological aging there. This research  
476 may provide crucial information for interventions in other less-developed regions.

#### 477 **Conclusions**

478 In summary, within the Southwest China population, we observed that healthy  
479 lifestyle changes were inversely related to comprehensive and organ-specific  
480 accelerated biological aging, with diet and smoking making the most significant  
481 contributions to the comprehensive BA and metabolic BA separately. These findings  
482 underscore the potential for lifestyle interventions to slow the aging pace and identify  
483 priority intervention targets to various organ-specific aging in less-developed regions.

#### 484 **Acknowledgements**

485 We sincerely thank all the participants and staff of the CMEC study. We  
486 gratefully acknowledge Professor Xiaosong Li, the former principal investigator of  
487 CMEC research, for his leadership and tremendous contribution to the establishment  
488 of CMEC. Professor Li passed away in 2019.

#### 489 **Authors' contributions**

490 DT, JY and XX designed the study. YZ and DT analyzed the data and drafted the

491 paper. All other authors were involved in the collection of the data. All authors made  
492 significant contributions to drafting and revising the manuscript and have approved  
493 the final version for publication.

#### 494 **Conflicts of Interest**

495 The authors declare that they have no potential conflicts of interest.

#### 496 **Data availability**

497 Data described in the manuscript, code book, and analytic code will be made available  
498 by contacting the corresponding author.

#### 499 **References**

- 500 1. ECONOMIC UNDF, AFFAIRS. S. World population prospects 2022: Summary of  
501 results: UN, 2023.
- 502 2. Pot AM, Oliveira D, Hoffman J. Towards healthy ageing in China: shaping person-  
503 centred long-term care. *Lancet*. 2022;400(10367):1905-6. doi: 10.1016/s0140-  
504 6736(22)02361-3.
- 505 3. Kennedy BK, Berger SL, Brunet A, Campisi J, Cuervo AM, Epel ES, et al.  
506 Geroscience: linking aging to chronic disease. *Cell*. 2014;159(4):709-13. doi:  
507 10.1016/j.cell.2014.10.039.
- 508 4. Hamczyk MR, Nevado RM, Barettino A, Fuster V, Andrés V. Biological Versus  
509 Chronological Aging: JACC Focus Seminar. *J Am Coll Cardiol*. 2020;75(8):919-30.  
510 doi: 10.1016/j.jacc.2019.11.062.
- 511 5. Schaum N, Lehallier B, Hahn O, Pálovics R, Hosseinzadeh S, Lee SE, et al. Ageing  
512 hallmarks exhibit organ-specific temporal signatures. *Nature*. 2020;583(7817):596-



- 513 602. doi: 10.1038/s41586-020-2499-y.
- 514 6. Jylhävä J, Pedersen NL, Hägg S. Biological Age Predictors. *EBioMedicine*.  
515 2017;21:29-36. doi: 10.1016/j.ebiom.2017.03.046.
- 516 7. Li X, Ploner A, Wang Y, Magnusson PK, Reynolds C, Finkel D, Pedersen NL, Jylhävä  
517 J, Hägg S. Longitudinal trajectories, correlations and mortality associations of nine  
518 biological ages across 20-years follow-up. *Elife*. 2020;9. doi: 10.7554/eLife.51507.
- 519 8. Nie C, Li Y, Li R, Yan Y, Zhang D, Li T, et al. Distinct biological ages of organs and  
520 systems identified from a multi-omics study. *Cell Rep*. 2022;38(10):110459. doi:  
521 10.1016/j.celrep.2022.110459.
- 522 9. Tian YE, Cropley V, Maier AB, Lautenschlager NT, Breakspear M, Zalesky A.  
523 Heterogeneous aging across multiple organ systems and prediction of chronic  
524 disease and mortality. *Nat Med*. 2023;29(5):1221-31. doi: 10.1038/s41591-023-  
525 02296-6.
- 526 10. Bauer SR, Newman JC. Interpreting Geroscience-Guided Biomarker Studies. *JAMA*  
527 *Intern Med*. 2022;182(3):300-2. doi: 10.1001/jamainternmed.2021.7812.
- 528 11. Belsky DW, Caspi A, Houts R, Cohen HJ, Corcoran DL, Danese A, et al.  
529 Quantification of biological aging in young adults. *Proc Natl Acad Sci U S A*.  
530 2015;112(30):E4104-10. doi: 10.1073/pnas.1506264112.
- 531 12. Elliott ML, Caspi A, Houts RM, Ambler A, Broadbent JM, Hancox RJ, et al. Disparities  
532 in the pace of biological aging among midlife adults of the same chronological age  
533 have implications for future frailty risk and policy. *Nat Aging*. 2021;1(3):295-308. doi:  
534 10.1038/s43587-021-00044-4.

- 535 13. Fiorito G, Caini S, Palli D, Bendinelli B, Saieva C, Ermini I, et al. DNA methylation-  
536 based biomarkers of aging were slowed down in a two-year diet and physical activity  
537 intervention trial: the DAMA study. *Aging Cell*. 2021;20(10):e13439. doi:  
538 10.1111/accel.13439.
- 539 14. Han Y, Hu Y, Yu C, Guo Y, Pei P, Yang L, et al. Lifestyle, cardiometabolic disease,  
540 and multimorbidity in a prospective Chinese study. *Eur Heart J*. 2021;42(34):3374-84.  
541 doi: 10.1093/eurheartj/ehab413.
- 542 15. Zhang YB, Chen C, Pan XF, Guo J, Li Y, Franco OH, Liu G, Pan A. Associations of  
543 healthy lifestyle and socioeconomic status with mortality and incident cardiovascular  
544 disease: two prospective cohort studies. *Bmj*. 2021;373:n604. doi: 10.1136/bmj.n604.
- 545 16. Henry A, Katsoulis M, Masi S, Fatemifar G, Denaxas S, Acosta D, Garfield V, Dale  
546 CE. The relationship between sleep duration, cognition and dementia: a Mendelian  
547 randomization study. *Int J Epidemiol*. 2019;48(3):849-60. doi: 10.1093/ije/dyz071.
- 548 17. Klopock ET, Carroll JE, Cole SW, Seeman TE, Crimmins EM. Lifetime exposure to  
549 smoking, epigenetic aging, and morbidity and mortality in older adults. *Clin*  
550 *Epigenetics*. 2022;14(1):72. doi: 10.1186/s13148-022-01286-8.
- 551 18. Kresovich JK, Martinez Lopez AM, Garval EL, Xu Z, White AJ, Sandler DP, Taylor JA.  
552 Alcohol Consumption and Methylation-Based Measures of Biological Age. *J Gerontol*  
553 *A Biol Sci Med Sci*. 2021;76(12):2107-11. doi: 10.1093/gerona/glab149.
- 554 19. Kresovich JK, Park YM, Keller JA, Sandler DP, Taylor JA. Healthy eating patterns  
555 and epigenetic measures of biological age. *Am J Clin Nutr*. 2022;115(1):171-9. doi:  
556 10.1093/ajcn/nqab307.

- 557 20. Gao X, Huang N, Guo X, Huang T. Role of sleep quality in the acceleration of  
558 biological aging and its potential for preventive interaction on air pollution insults:  
559 Findings from the UK Biobank cohort. *Aging Cell*. 2022;21(5):e13610. doi:  
560 10.1111/accel.13610.
- 561 21. Wang C, Guan X, Bai Y, Feng Y, Wei W, Li H, et al. A machine learning-based  
562 biological aging prediction and its associations with healthy lifestyles: the Dongfeng-  
563 Tongji cohort. *Ann N Y Acad Sci*. 2022;1507(1):108-20. doi: 10.1111/nyas.14685.
- 564 22. Liang X, Zhang WS, Jin YL, Jiang CQ, Zhu F, Cheng KK, Lam TH, Xu L. Association  
565 of Multi-Dimensional Factors with Accelerating Age and Constructing a Healthy  
566 Lifestyle Index: Guangzhou Biobank Cohort Study. *Gerontology*. 2023;69(6):737-47.  
567 doi: 10.1159/000528760.
- 568 23. Thomas A, Belsky DW, Gu Y. Healthy Lifestyle Behaviors and Biological Aging in the  
569 U.S. National Health and Nutrition Examination Surveys 1999-2018. *J Gerontol A Biol  
570 Sci Med Sci*. 2023;78(9):1535-42. doi: 10.1093/gerona/glad082.
- 571 24. Yang G, Cao X, Li X, Zhang J, Ma C, Zhang N, et al. Association of Unhealthy  
572 Lifestyle and Childhood Adversity With Acceleration of Aging Among UK Biobank  
573 Participants. *JAMA Netw Open*. 2022;5(9):e2230690. doi:  
574 10.1001/jamanetworkopen.2022.30690.
- 575 25. Zhong X, Lu Y, Gao Q, Nyunt MSZ, Fulop T, Monterola CP, Tong JC, Larbi A, Ng TP.  
576 Estimating Biological Age in the Singapore Longitudinal Aging Study. *J Gerontol A  
577 Biol Sci Med Sci*. 2020;75(10):1913-20. doi: 10.1093/gerona/glz146.
- 578 26. Zhao X, Hong F, Yin J, Tang W, Zhang G, Liang X, Li J, Cui C, Li X. Cohort Profile:

- 579 the China Multi-Ethnic Cohort (CMEC) study. *Int J Epidemiol.* 2021;50(3):721-l. doi:  
580 10.1093/ije/dyaa185.
- 581 27. Guasch-Ferré M, Li Y, Bhupathiraju SN, Huang T, Drouin-Chartier JP, Manson JE, et  
582 al. Healthy Lifestyle Score Including Sleep Duration and Cardiovascular Disease Risk.  
583 *Am J Prev Med.* 2022;63(1):33-42. doi: 10.1016/j.amepre.2022.01.027.
- 584 28. Xiao X, Qin Z, Lv X, Dai Y, Ciren Z, Yangla Y, et al. Dietary patterns and  
585 cardiometabolic risks in diverse less-developed ethnic minority regions: results from  
586 the China Multi-Ethnic Cohort (CMEC) Study. *Lancet Reg Health West Pac.*  
587 2021;15:100252. doi: 10.1016/j.lanwpc.2021.100252.
- 588 29. Millwood IY, Im PK, Bennett D, Hariri P, Yang L, Du H, et al. Alcohol intake and  
589 cause-specific mortality: conventional and genetic evidence in a prospective cohort  
590 study of 512□000 adults in China. *Lancet Public Health.* 2023;8(12):e956-e67. doi:  
591 10.1016/s2468-2667(23)00217-7.
- 592 30. Mazza E, Ferro Y, Pujia R, Mare R, Maurotti S, Montalcini T, Pujia A. Mediterranean  
593 Diet In Healthy Aging. *J Nutr Health Aging.* 2021;25(9):1076-83. doi: 10.1007/s12603-  
594 021-1675-6.
- 595 31. Luo M, Gupta N, Holtermann A, Stamatakis E, Ding D. Revisiting the 'physical activity  
596 paradox' in a Chinese context: Occupational physical activity and mortality in 142,302  
597 urban working adults from the China Kadoorie Biobank study. *Lancet Reg Health*  
598 *West Pac.* 2022;23:100457. doi: 10.1016/j.lanwpc.2022.100457.
- 599 32. Chaput JP, Dutil C, Featherstone R, Ross R, Giangregorio L, Saunders TJ, et al.  
600 Sleep duration and health in adults: an overview of systematic reviews. *Appl Physiol*

- 601 Nutr Metab. 2020;45(10 (Suppl. 2)):S218-s31. doi: 10.1139/apnm-2020-0034.
- 602 33. Klemra P, Doubal S. A new approach to the concept and computation of biological  
603 age. Mech Ageing Dev. 2006;127(3):240-8. doi: 10.1016/j.mad.2005.10.004.
- 604 34. Chen L, Zhang Y, Yu C, Guo Y, Sun D, Pang Y, et al. Modeling biological age using  
605 blood biomarkers and physical measurements in Chinese adults. EBioMedicine.  
606 2023;89:104458. doi: 10.1016/j.ebiom.2023.104458.
- 607 35. Xiang Y, Xu H, Chen H, Tang D, Huang Z, Zhang Y, et al. Tea consumption and  
608 attenuation of biological aging: a longitudinal analysis from two cohort studies. Lancet  
609 Reg Health West Pac. 2024;42:100955. doi: 10.1016/j.lanwpc.2023.100955.
- 610 36. Keil AP, Buckley JP, O'Brien KM, Ferguson KK, Zhao S, White AJ. A Quantile-Based  
611 g-Computation Approach to Addressing the Effects of Exposure Mixtures. Environ  
612 Health Perspect. 2020;128(4):47004. doi: 10.1289/ehp5838.
- 613 37. Zhang N, Liu X, Wang L, Zhang Y, Xiang Y, Cai J, Xu H, Xiao X, Zhao X. Lifestyle  
614 factors and their relative contributions to longitudinal progression of cardio-renal-  
615 metabolic multimorbidity: a prospective cohort study. Cardiovasc Diabetol.  
616 2024;23(1):265. doi: 10.1186/s12933-024-02347-3.
- 617 38. Sun Q, Yu D, Fan J, Yu C, Guo Y, Pei P, et al. Healthy lifestyle and life expectancy at  
618 age 30 years in the Chinese population: an observational study. Lancet Public Health.  
619 2022;7(12):e994-e1004. doi: 10.1016/s2468-2667(22)00110-4.
- 620 39. Lao XQ, Ma WJ, Sobko T, Zhang YH, Xu YJ, Xu XJ, et al. Dramatic escalation in  
621 metabolic syndrome and cardiovascular risk in a Chinese population experiencing  
622 rapid economic development. BMC Public Health. 2014;14:983. doi: 10.1186/1471-

- 623 2458-14-983.
- 624 40. Zhou YF, Song XY, Pan XF, Feng L, Luo N, Yuan JM, Pan A, Koh WP. Association  
625 Between Combined Lifestyle Factors and Healthy Ageing in Chinese Adults: The  
626 Singapore Chinese Health Study. *J Gerontol A Biol Sci Med Sci*. 2021;76(10):1796-  
627 805. doi: 10.1093/gerona/qlab033.
- 628 41. Kim K, Zheng Y, Joyce BT, Jiang H, Greenland P, Jacobs DR, Jr., et al. Relative  
629 contributions of six lifestyle- and health-related exposures to epigenetic aging: the  
630 Coronary Artery Risk Development in Young Adults (CARDIA) Study. *Clin  
631 Epigenetics*. 2022;14(1):85. doi: 10.1186/s13148-022-01304-9.
- 632 42. Simons RL, Ong ML, Lei MK, Klopach E, Berg M, Zhang Y, Philibert R, Gibbons FX,  
633 Beach SRH. Shifts in lifestyle and socioeconomic circumstances predict change-for-  
634 better or worse-in speed of epigenetic aging: A study of middle-aged black women.  
635 *Soc Sci Med*. 2022;307:115175. doi: 10.1016/j.socscimed.2022.115175.
- 636 43. Wang S, Li W, Li S, Tu H, Jia J, Zhao W, et al. Association between plant-based  
637 dietary pattern and biological aging trajectory in a large prospective cohort. *BMC Med*.  
638 2023;21(1):310. doi: 10.1186/s12916-023-02974-9.
- 639 44. Watts EL, Matthews CE, Freeman JR, Gorzelitz JS, Hong HG, Liao LM, McClain KM,  
640 Saint-Maurice PF, Shiroma EJ, Moore SC. Association of Leisure Time Physical  
641 Activity Types and Risks of All-Cause, Cardiovascular, and Cancer Mortality Among  
642 Older Adults. *JAMA Netw Open*. 2022;5(8):e2228510. doi:  
643 10.1001/jamanetworkopen.2022.28510.
- 644 45. Kankaanpää A, Tolvanen A, Bollepalli S, Leskinen T, Kujala UM, Kaprio J, Ollikainen

- 645 M, Sillanpää E. Leisure-Time and Occupational Physical Activity Associates  
646 Differently with Epigenetic Aging. *Med Sci Sports Exerc.* 2021;53(3):487-95. doi:  
647 10.1249/mss.0000000000002498.
- 648 46. Galkin F, Kovalchuk O, Koldasbayeva D, Zhavoronkov A, Bischof E. Stress, diet,  
649 exercise: Common environmental factors and their impact on epigenetic age. *Ageing*  
650 *Res Rev.* 2023;88:101956. doi: 10.1016/j.arr.2023.101956.
- 651 47. Zhang L, Liu Y, Sun Y, Zhang X. Combined Physical Exercise and Diet: Regulation of  
652 Gut Microbiota to Prevent and Treat of Metabolic Disease: A Review. *Nutrients.*  
653 2022;14(22). doi: 10.3390/nu14224774.
- 654 48. Aleksandrova K, Koelman L, Rodrigues CE. Dietary patterns and biomarkers of  
655 oxidative stress and inflammation: A systematic review of observational and  
656 intervention studies. *Redox Biol.* 2021;42:101869. doi: 10.1016/j.redox.2021.101869.
- 657 49. El Assar M, Álvarez-Bustos A, Sosa P, Angulo J, Rodríguez-Mañas L. Effect of  
658 Physical Activity/Exercise on Oxidative Stress and Inflammation in Muscle and  
659 Vascular Aging. *Int J Mol Sci.* 2022;23(15). doi: 10.3390/ijms23158713.
- 660  
661

662 **Tables**

663 **Table 1. Characteristics of participants in baseline and repeated surveys, based**

664 **on the categorized HLI<sup>1</sup>**

| Characteristic                     | Baseline HLI (category)    |                            | Follow up HLI (category)   |                            |
|------------------------------------|----------------------------|----------------------------|----------------------------|----------------------------|
|                                    | unfavorable<br>N = 4935    | healthy<br>N = 3461        | unfavorable<br>N = 5121    | healthy<br>N = 3275        |
| Age (years)                        | 51.83 [44.97, 60.44]       | 49.19 [42.51, 56.66]       | 53.75 [47.01, 62.24]       | 50.86 [44.21, 59.14]       |
| Female (%)                         | 2511 (50.9)                | 2666 (77.0)                | 2685 (52.4)                | 2492 (76.1)                |
| Urbanicity (%)                     | 1472 (29.8)                | 1525 (44.1)                | 1527 (29.8)                | 1470 (44.9)                |
| Majority (%)                       | 2665 (54.0)                | 2427 (70.1)                | 2763 (54.0)                | 2329 (71.1)                |
| Education (%)                      |                            |                            |                            |                            |
| No schooling                       | 1506 (30.5)                | 653 (18.9)                 | 1554 (30.3)                | 605 (18.5)                 |
| Primary school                     | 1305 (26.4)                | 721 (20.8)                 | 1377 (26.9)                | 649 (19.8)                 |
| Middle/high school                 | 1764 (35.7)                | 1525 (44.1)                | 1780 (34.8)                | 1509 (46.1)                |
| College/university                 | 360 (7.3)                  | 562 (16.2)                 | 410 (8.0)                  | 512 (15.6)                 |
| Occupation(%)                      |                            |                            |                            |                            |
| Primary industry practitioner      | 1993 (40.4)                | 820 (23.7)                 | 2093 (40.9)                | 826 (25.2)                 |
| Secondary industry practitioner    | 335 (6.8)                  | 197 (5.7)                  | 396 (7.7)                  | 174 (5.3)                  |
| Tertiary industry practitioner     | 1699 (34.4)                | 1671 (48.3)                | 1736 (33.9)                | 1462 (44.6)                |
| Unemployed                         | 908 (18.4)                 | 773 (22.3)                 | 896 (17.5)                 | 813 (24.8)                 |
| Married (%)                        | 4396 (89.1)                | 3111 (89.9)                | 4595 (89.7)                | 2966 (90.6)                |
| Total energy intake (kcal/day)     | 1796.35 [1394.49, 2293.37] | 1759.71 [1404.92, 2156.58] | 1510.72 [1129.17, 1994.64] | 1482.29 [1183.94, 1879.82] |
| BMI (kg/m <sup>2</sup> )           | 24.29 [21.94, 26.79]       | 24.12 [22.04, 26.47]       | 24.61 [22.23, 27.05]       | 24.34 [22.31, 26.73]       |
| Depression symptom (%)             | 289 (5.9)                  | 117 (3.4)                  | 203 (4.0)                  | 86 (2.6)                   |
| Anxiety symptom (%)                | 335 (6.8)                  | 146 (4.2)                  | 212 (4.1)                  | 71 (2.2)                   |
| Menopausal status in women (%)     |                            |                            |                            |                            |
| Premenopausal                      | 1042 (41.5)                | 1336 (50.1)                | 914 (34.0)                 | 1099 (44.1)                |
| Perimenopausal                     | 170 (6.8)                  | 189 (7.1)                  | 133 (5.0)                  | 109 (4.4)                  |
| Postmenopausal                     | 1299 (51.7)                | 1141 (42.8)                | 1638 (61.0)                | 1284 (51.5)                |
| Beverage (%)                       |                            |                            |                            |                            |
| Never                              | 4564 (92.5)                | 3292 (95.1)                | 4746 (92.7)                | 3079 (94.0)                |
| Former consumer                    | 23 (0.5)                   | 16 (0.5)                   | 27 (0.5)                   | 14 (0.4)                   |
| Currently consuming                | 348 (7.1)                  | 153 (4.4)                  | 348 (6.8)                  | 182 (5.6)                  |
| Dietary supplement intake (%)      | 711 (14.4)                 | 722 (20.9)                 | 724 (14.1)                 | 712 (21.7)                 |
| <b>Major diseases</b>              |                            |                            |                            |                            |
| Diabetes (%)                       | 245 (5.0)                  | 161 (4.7)                  | 275 (5.4)                  | 159 (4.9)                  |
| CVD (%)                            | 974 (19.7)                 | 628 (18.1)                 | 1054 (20.6)                | 602 (18.4)                 |
| Cancer (%)                         | 36 (0.7)                   | 31 (0.9)                   | 39 (0.8)                   | 32 (1.0)                   |
| <b>Biological ages<sup>2</sup></b> |                            |                            |                            |                            |
| Comprehensive BA                   | 52.35 [43.90, 61.07]       | 49.15 [40.19, 58.61]       | 54.78 [46.48, 63.45]       | 51.67 [42.74, 61.31]       |



|                                 |                      |                      |                      |                      |
|---------------------------------|----------------------|----------------------|----------------------|----------------------|
| Comprehensive BA acceleration   | 0.00 [-2.89, 3.00]   | -0.70 [-3.79, 2.73]  | 0.40 [-2.66, 3.48]   | -0.13 [-3.21, 3.25]  |
| Cardiopulmonary BA              | 51.86 [45.05, 60.40] | 49.10 [42.48, 56.89] | 53.79 [47.07, 62.14] | 50.82 [43.97, 59.18] |
| Cardiopulmonary BA acceleration | 0.08 [-0.47, 0.59]   | -0.03 [-0.65, 0.55]  | 0.04 [-0.56, 0.62]   | -0.08 [-0.71, 0.56]  |
| Metabolic BA                    | 52.87 [43.86, 61.78] | 49.42 [40.53, 59.01] | 55.14 [46.10, 64.29] | 52.29 [42.89, 61.77] |
| Metabolic BA acceleration       | 0.55 [-3.86, 4.85]   | -0.37 [-4.41, 3.86]  | 0.46 [-3.87, 4.94]   | 0.32 [-3.93, 4.46]   |
| Liver BA                        | 52.42 [41.08, 63.96] | 49.40 [37.83, 60.43] | 57.61 [46.15, 68.52] | 54.13 [42.31, 64.32] |
| Liver BA acceleration           | 0.15 [-8.16, 8.46]   | -0.88 [-8.50, 6.73]  | 2.88 [-5.31, 11.58]  | 1.11 [-6.02, 9.08]   |

665 BA, biological age; BMI, body mass index; CVD, cardiovascular disease; HLI,  
 666 healthy lifestyle indicator.

667 <sup>1</sup> Data are presented as median (25th, 75th percentile) for continuous variables and  
 668 count (percentage) for categorical variables. For HLI (category), "healthy"  
 669 corresponds to a score of 4-5, while "unfavorable" corresponds to a score of 0-3.

670 <sup>2</sup> Information on each validated BA has been reported. BA acceleration is the  
 671 difference between each BA and CA in the same survey.

672

673 **Table 2 Associations of healthy lifestyle factors and HLI with the BA acceleration**

674 **of validated BAs**

| Variables                   | Comprehensive<br>BA acceleration<br>$\beta$ (95%CI) | Cardiopulmonary<br>BA acceleration<br>$\beta$ (95%CI) | Metabolic<br>BA acceleration<br>$\beta$ (95%CI) | Liver<br>BA acceleration<br>$\beta$ (95%CI) |
|-----------------------------|-----------------------------------------------------|-------------------------------------------------------|-------------------------------------------------|---------------------------------------------|
| HLI (range)                 |                                                     |                                                       |                                                 |                                             |
| Per 1-point increase        | -0.11 (-0.19, -0.03)                                | -0.02 (-0.04, -0.01)                                  | -0.12 (-0.22, -0.02)                            | -0.23 (-0.47, 0.00)                         |
| HLI (category)              |                                                     |                                                       |                                                 |                                             |
| To have a healthy lifestyle | -0.19 (-0.34, -0.03)                                | -0.03 (-0.07, 0.00)                                   | -0.16 (-0.36, 0.03)                             | -0.19 (-0.66, 0.27)                         |
| Healthy lifestyle factors   |                                                     |                                                       |                                                 |                                             |
| $\Delta$ Smoking            | -0.13 (-0.47, 0.21)                                 | -0.03 (-0.10, 0.04)                                   | -0.54 (-0.97, -0.11)                            | -0.57 (-1.58, 0.44)                         |
| $\Delta$ Alcohol            | -0.17 (-0.47, 0.13)                                 | -0.02 (-0.09, 0.04)                                   | -0.18 (-0.56, 0.21)                             | -0.59 (-1.50, 0.31)                         |
| $\Delta$ Diet               | -0.15 (-0.29, -0.00)                                | -0.01 (-0.04, 0.02)                                   | -0.18 (-0.36, 0.00)                             | -0.10 (-0.53, 0.33)                         |
| $\Delta$ Exercise           | -0.16 (-0.32, 0.00)                                 | -0.03 (-0.07, 0.00)                                   | -0.09 (-0.30, 0.11)                             | -0.05 (-0.53, 0.44)                         |
| $\Delta$ Sleep              | -0.02 (-0.16, 0.12)                                 | -0.02 (-0.05, 0.01)                                   | 0.01 (-0.17, 0.19)                              | -0.36 (-0.78, 0.06)                         |

675 BA, biological age; HLI, healthy lifestyle indicator.

676  $\Delta$ Smoking, change in smoking status between the baseline and repeated survey;

677  $\Delta$ Alcohol, change in alcohol consumption between the baseline and repeated survey;

678  $\Delta$ Diet, change in dietary quality between the baseline and repeated survey;  $\Delta$ Exercise,

679 change in exercise between the baseline and repeated survey;  $\Delta$ Sleep, change in sleep

680 between the baseline and repeated survey; CI, confidence interval.

681 Estimates were obtained using FEMs treating the BA accelerations as the dependent

682 variables and HLI (as either continuous or as categorized) or five individual lifestyle

683 factors as the independent variables. Models were adjusted for age, occupation,

684 marital status, total energy intake, depression symptoms, anxiety symptoms,

685 menopausal status in women, beverage intake, dietary supplement intake, diabetes,

686 cardiovascular disease, cancer, sex, ethnicity, urbanicity, education, and the

687 participants' age at baseline.

688 **Figure legends**

689 **Figure 1. Changes in lifestyle factors from baseline to repeated survey**

690 HLI, healthy lifestyle indicator.

691 The blue bars represent the percentage of individuals who have transitioned to  
692 healthier behaviors or improved their HLI score; the gray bars represent the  
693 percentage of individuals whose behaviors or HLI score have not changed; the orange  
694 bars represent the percentage of individuals who have transitioned to unhealthier  
695 behaviors or whose HLI score has decreased.

696 **Figure 2 Relative contributions of five healthy lifestyle components to BAs**  
697 **acceleration**

698 Panels: Results of the comprehensive BA acceleration, the cardiopulmonary BA  
699 acceleration, the metabolic BA acceleration, and the liver BA acceleration (A–D).

700  $\Delta$ Smoking, change in smoking status between the baseline and repeated survey;  
701  $\Delta$ Alcohol, change in alcohol consumption between the baseline and repeated survey;  
702  $\Delta$ Diet, change in dietary quality between the baseline and repeated survey;  $\Delta$ Exercise,  
703 change in exercise between the baseline and repeated survey;  $\Delta$ Sleep, change in sleep  
704 between the baseline and repeated survey.

705 Estimates were obtained using QGC, which treated the BA accelerations as the  
706 dependent variables and five individual lifestyle factors as the independent variables.

707 Models were adjusted for age, occupation, marital status, total energy intake,  
708 depression symptoms, anxiety symptoms, menopausal status in women, beverage  
709 intake, dietary supplement intake, diabetes, cardiovascular disease, cancer, sex,

710 ethnicity, urbanicity, education, and the participants' age at baseline.

711 The blue bars represent results that are statistically significant in the FEM analysis,

712 while the gray bars represent results in the FEM analysis that were not found to be

713 statistically significant and positive weights were not shown.

714 **Figure 3 Stratified analysis of estimated associations between the HLI and the**

715 **comprehensive BA acceleration**

716 All models were adjusted for age, occupation, marital status, total energy intake,

717 depression symptoms, anxiety symptoms, menopausal status in women, beverage

718 intake, dietary supplement intake, diabetes, cardiovascular disease, cancer, sex,

719 ethnicity, urbanicity, education, and the participants' age at baseline, with exclusion of

720 the stratified variable as appropriate. The boxes represent point estimations.

721 Horizontal lines represent 95% CI.

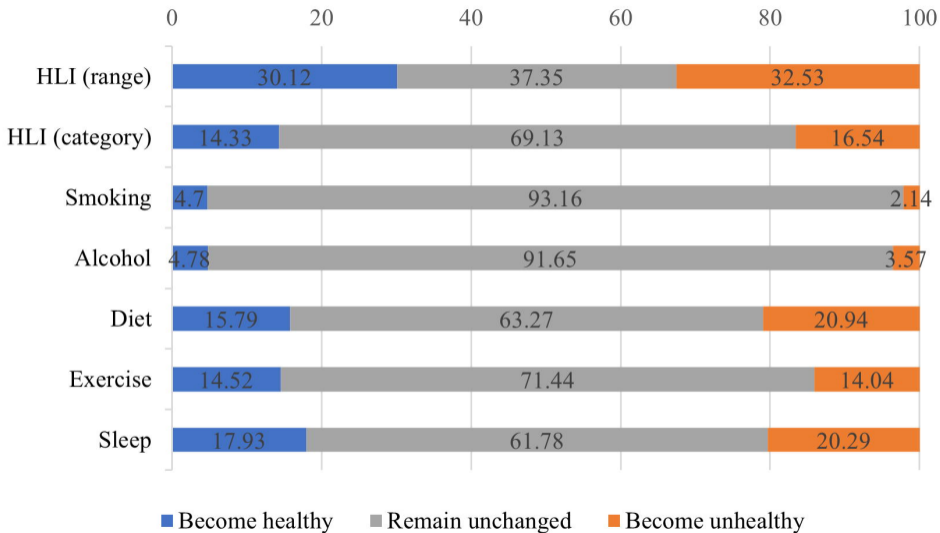

**a Comprehensive BA**

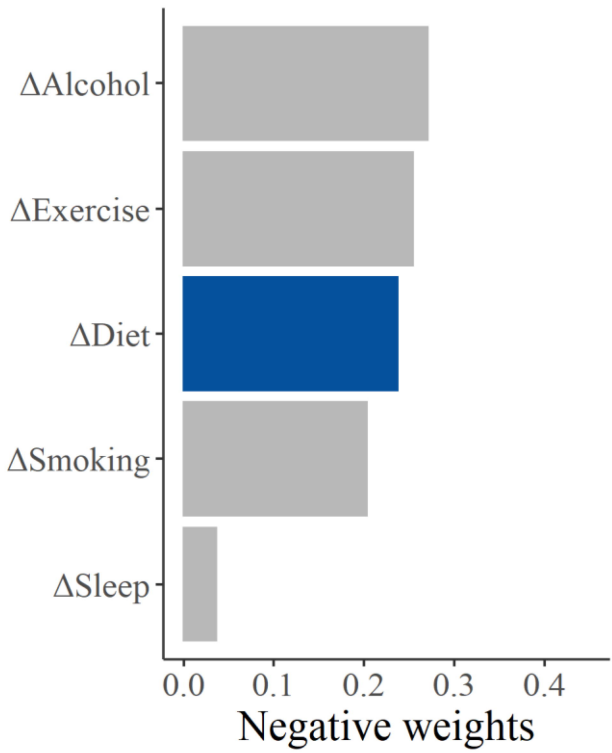

**b Cardiopulmonary BA**

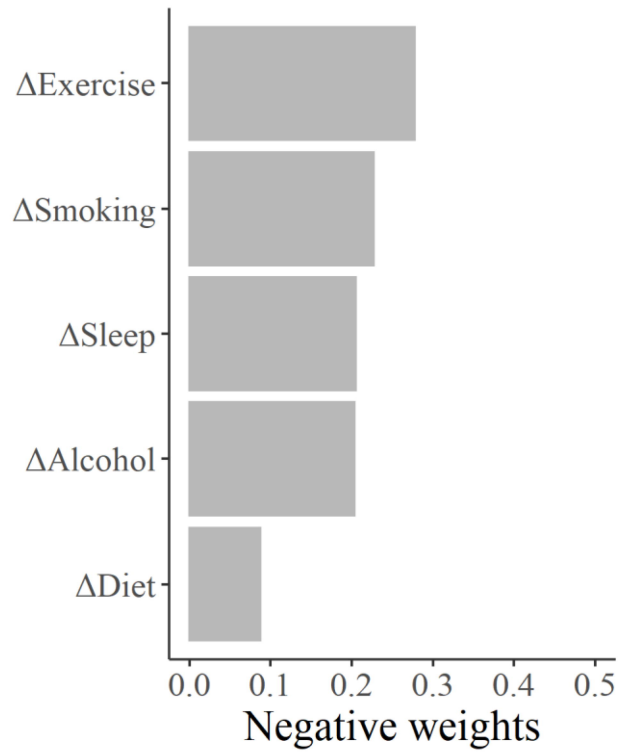

**c Metabolic BA**

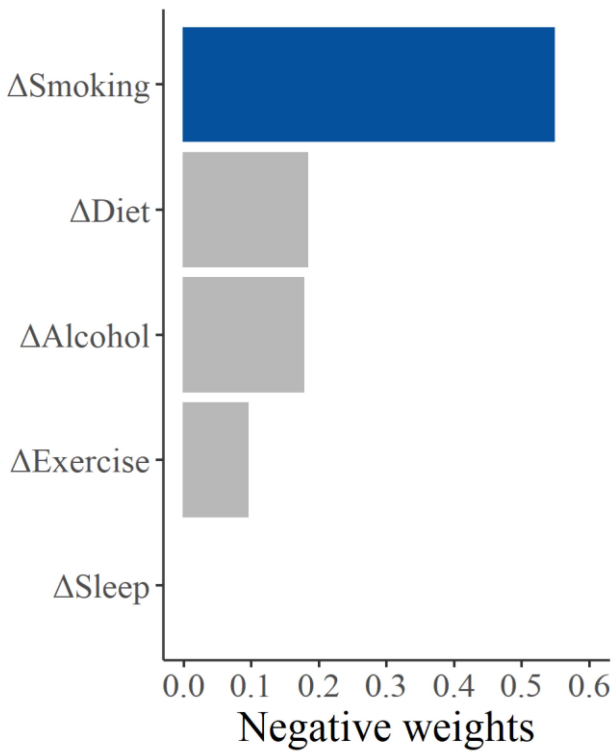

**d Liver BA**

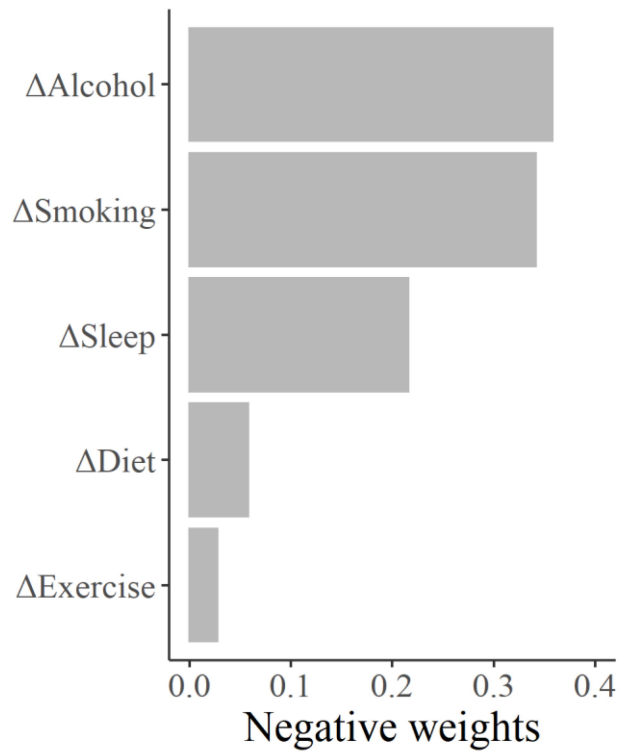

**group**  
Healthy  
Non-significant

## HLI (range)

## HLI (category)

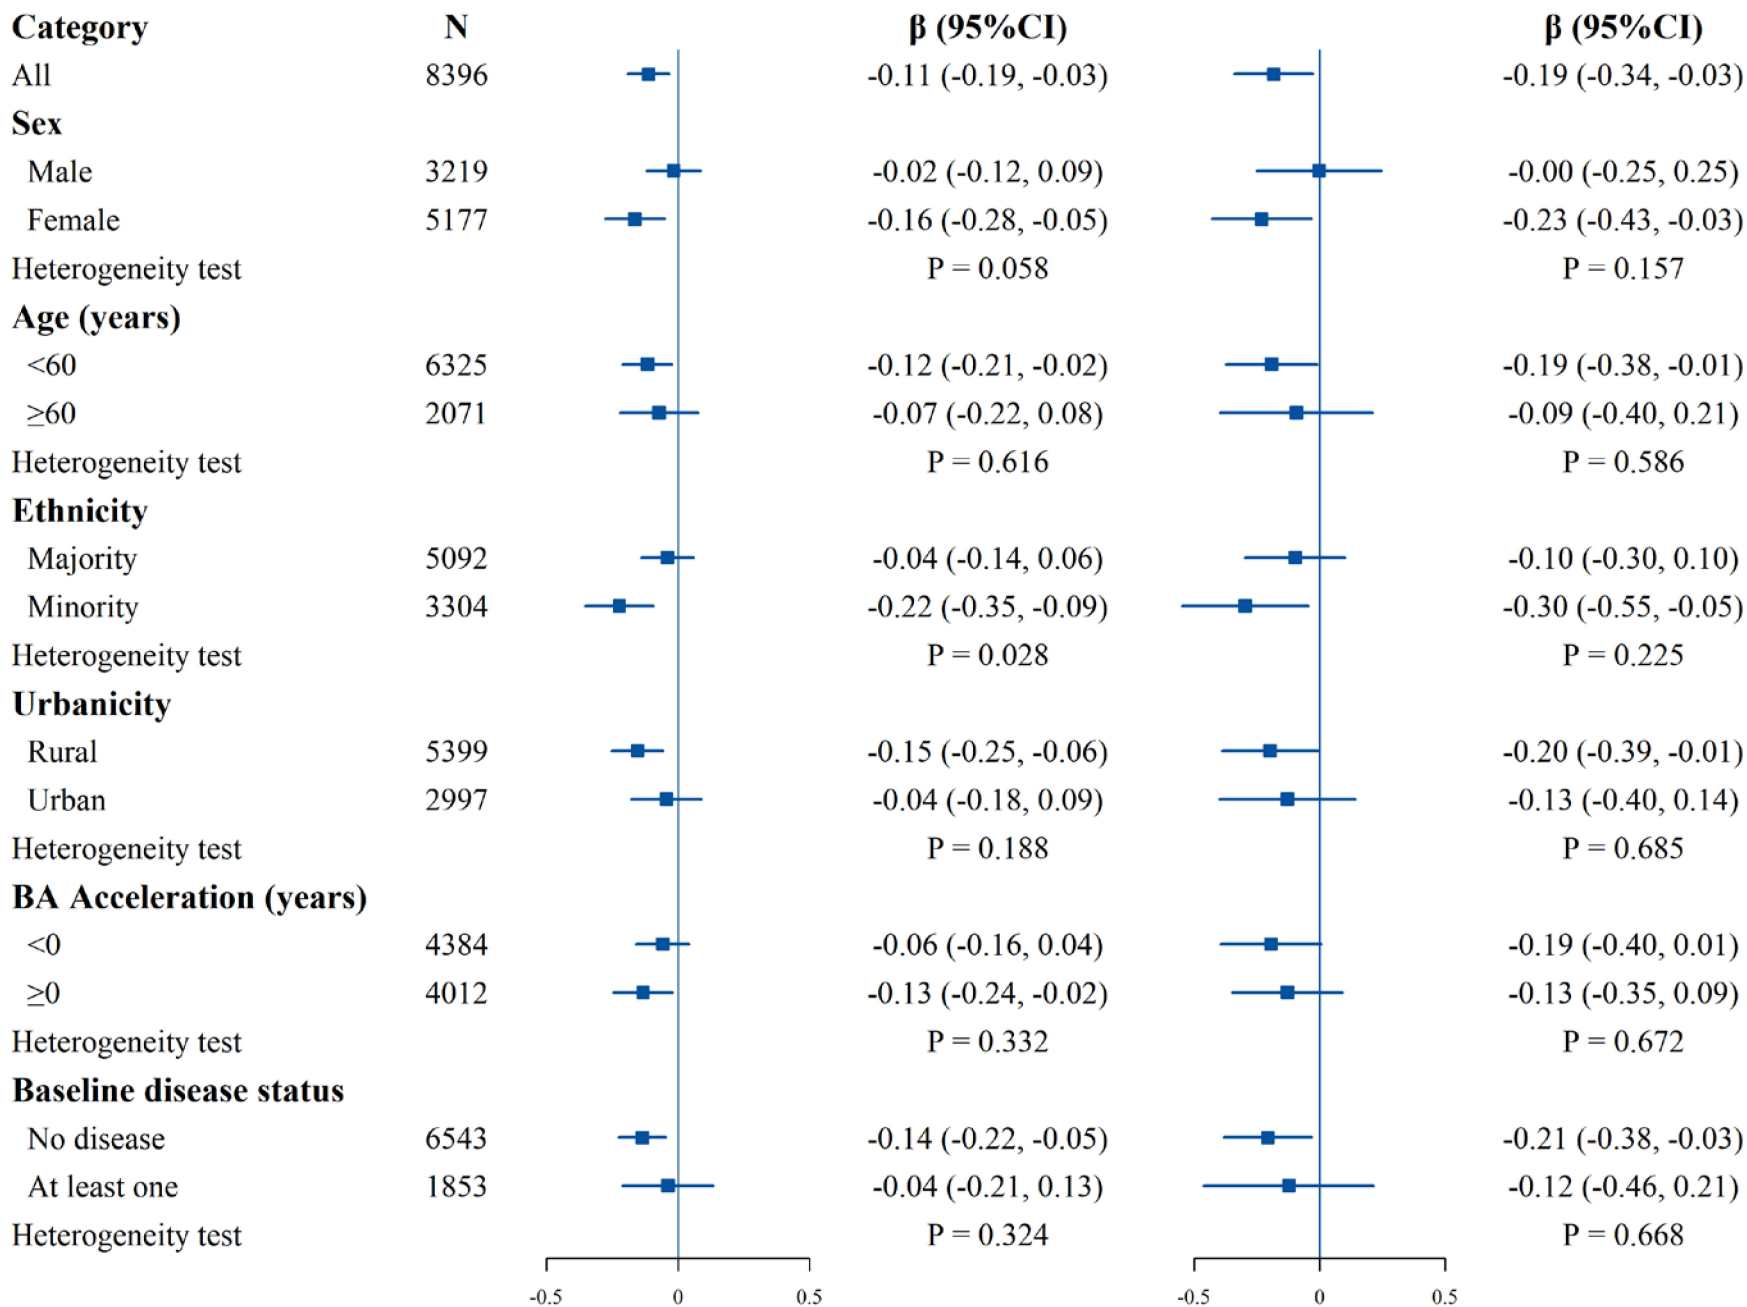

Source: https://medrxiv.org/content/10.1101/2024.06.03.24308368v2.full.pdf
